# Supplementary material for: Quantitative coronary angiography versus intravascular ultrasound guidance for drug-eluting stent implantation (GUIDE-DES): study protocol for a randomised controlled non-inferiority trial
Source: PubMed Central journal article supplement — BMJ Open. 2022 Jan 13;12(1):e052215. doi: 10.1136/bmjopen-2021-052215 (PMC8762144; doi:10.1136/bmjopen-2021-052215), 2022-01-13
Supplement: bmjopen-2021-052215.draft_revisions.pdf [file bmjopen-2021-052215.draft_revisions.pdf]

# BMJ Open

BMJ Open is committed to open peer review. As part of this commitment we make the peer review history of every article we publish publicly available.

When an article is published we post the peer reviewers' comments and the authors' responses online. We also post the versions of the paper that were used during peer review. These are the versions that the peer review comments apply to.

The versions of the paper that follow are the versions that were submitted during the peer review process. They are not the versions of record or the final published versions. They should not be cited or distributed as the published version of this manuscript.

BMJ Open is an open access journal and the full, final, typeset and author-corrected version of record of the manuscript is available on our site with no access controls, subscription charges or pay-per-view fees (<http://bmjopen.bmj.com>).

If you have any questions on BMJ Open's open peer review process please email [info.bmjopen@bmj.com](mailto:info.bmjopen@bmj.com)

# BMJ Open

## Quantitative coronary angiography versus intravascular ultrasound guidance for drug-eluting stent implantation (GUIDE-DES): study protocol for a randomised controlled trial

|                               |                                                                                                                                                                                                                                                                                                                                                                                                                                                                        |
|-------------------------------|------------------------------------------------------------------------------------------------------------------------------------------------------------------------------------------------------------------------------------------------------------------------------------------------------------------------------------------------------------------------------------------------------------------------------------------------------------------------|
| Journal:                      | <i>BMJ Open</i>                                                                                                                                                                                                                                                                                                                                                                                                                                                        |
| Manuscript ID                 | bmjopen-2021-052215                                                                                                                                                                                                                                                                                                                                                                                                                                                    |
| Article Type:                 | Protocol                                                                                                                                                                                                                                                                                                                                                                                                                                                               |
| Date Submitted by the Author: | 18-Apr-2021                                                                                                                                                                                                                                                                                                                                                                                                                                                            |
| Complete List of Authors:     | Lee, Pil Hyung; Asan Medical Center, Cardiology<br>Hong, Soon Jun; Korea University Anam Hospital, Department of Cardiology<br>Kim, Hyun-Sook<br>Yoon, Young won<br>Lee, Jong-Young<br>Oh, Seung-Jin<br>Kang, Soo-Jin; Asan Medical Center, Cardiology<br>Kim, Young-Hak; Asan Medical Center, Cardiology<br>Park, Seong-Wook; Asan Medical Center, Cardiology<br>Lee, Seung-Whan; Asan Medical Center, Cardiology<br>Lee, Cheol Whan; Asan Medical Center, Cardiology |
| Keywords:                     | Coronary heart disease < CARDIOLOGY, Coronary intervention < CARDIOLOGY, Ischaemic heart disease < CARDIOLOGY                                                                                                                                                                                                                                                                                                                                                          |
|                               |                                                                                                                                                                                                                                                                                                                                                                                                                                                                        |

SCHOLARONE™  
Manuscripts

1  
2  
3  
4 **Protocol Paper**

5  
6 **Quantitative coronary angiography versus intravascular ultrasound**  
7  
8  
9 **guidance for drug-eluting stent implantation (GUIDE-DES): study protocol**  
10  
11  
12 **for a randomised controlled trial**

13  
14 Pil Hyung Lee<sup>1</sup>, MD; Soon Jun Hong<sup>2</sup>, MD; Hyun-Sook Kim<sup>3</sup>, MD; Young won Yoon<sup>4</sup>, MD;  
15  
16 Jong-Young Lee<sup>5</sup>, MD; Seung-Jin Oh<sup>6</sup>, MD; Soo-Jin Kang<sup>1</sup>, MD, Young-Hak Kim<sup>1</sup>, MD;  
17  
18 Seong-Wook Park<sup>1</sup>, MD, Seung-Whan Lee<sup>1</sup>, MD; Cheol-Whan Lee<sup>1</sup>; The GUIDE-DES Trial  
19  
20 Research Group

21  
22  
23 <sup>1</sup>Division of Cardiology, Department of Internal Medicine, Asan Medical Center, University  
24  
25 of Ulsan College of Medicine, Seoul, Korea; <sup>2</sup>Department of Cardiology, Cardiovascular  
26  
27 Center, Korea University Anam Hospital, Seoul, Korea; <sup>3</sup>Department of Cardiology, Hallym  
28  
29 University Sacred Heart Hospital, Anyang, Korea; <sup>4</sup>Division of Cardiology, Gangnam  
30  
31 Severance Hospital, Yonsei University College of Medicine, Seoul, Korea; <sup>5</sup>Division of  
32  
33 Cardiology, Department of Internal Medicine, Kangbuk Samsung Hospital, Sungkyunkwan  
34  
35 University School of Medicine, Seoul, Korea; <sup>6</sup>Department of Cardiology, National Health  
36  
37 Insurance Service Ilsan Hospital, Gyeonggi-do, Korea

38  
39 **Keywords:** coronary artery disease, intravascular ultrasound, percutaneous coronary  
40  
41 intervention, quantitative coronary angiography

42  
43  
44 **Total word count:** 3,976

45  
46 **Address for correspondence:**

47  
48 **Drs. Cheol Whan Lee and Seung-Whan Lee**

49  
50  
51 Division of Cardiology, Department of Internal Medicine, Asan Medical Center, University  
52  
53 of Ulsan, 88, Olympic-ro 43-gil, Songpa-gu, Seoul 138-736, Korea

54  
55  
56 Tel: +82-2-3010-3150; Fax: +82-2-486-5918

57  
58  
59 E-mail: [cheolwlee@amc.seoul.kr](mailto:cheolwlee@amc.seoul.kr) and [seungwlee@amc.seoul.kr](mailto:seungwlee@amc.seoul.kr)

## ABSTRACT

**Introduction:** Angiography remains the gold standard for guiding percutaneous coronary intervention (PCI). However, it is prone to suboptimal stent results due to the visual estimation of coronary measurements. Although the benefit of intravascular ultrasound (IVUS)-guided PCI is becoming increasingly recognised, IVUS is not affordable for many catheterisation laboratories. Thus, a more practical and standardised angiography-based approach is necessary to support stent implantation.

**Methods and analysis:** The Quantitative Coronary Angiography versus Intravascular Ultrasound Guidance for Drug-Eluting Stent Implantation (GUIDE-DES) trial is a randomised, investigator-initiated, multi-centre, open-label trial comparing the quantitative coronary angiography (QCA)-guided PCI strategy with IVUS-guided PCI in all-comer patients with significant coronary artery disease. A total of 1,528 patients will be randomised to either group at a 1:1 ratio. A novel PCI protocol for the QCA-guided group will be provided to all participating operators, while the PCI optimisation criteria will be predefined for both strategies. The primary endpoint is the 12-month cumulative incidence of target-lesion failure defined as a composite of cardiac death, target-vessel myocardial infarction, or ischaemia-driven target-lesion revascularisation. Clinical follow-up assessments are scheduled at 1, 6, and 12 months for all patients enrolled in the study.

**Ethics and dissemination:** Ethics approval for this study was granted by the Institutional Review Board of Asan Medical Center (no. 2017-0060). The study findings will be published in peer-reviewed journal articles and disseminated through public forums and academic conference presentations. Cost-effectiveness and secondary imaging analyses will be shared in secondary papers.

**Clinical Trial Registration:** Clinicaltrials.gov (identifier: NCT02978456)

## Article Summary

### Strengths and limitations of this study

- For the first time, the GUIDE-DES trial will evaluate the potential of standardized QCA-based PCI algorithm into clinical context.
- A practical protocol of QCA-guided PCI has been developed for the trial.
- The trial uses a pragmatic design with inclusion criteria designed to capture a broad range of real-world patients with diverse clinical and anatomical features.
- Bias in event ascertainment may not be ruled out given the open-label trial design.

## INTRODUCTION

Intravascular ultrasound (IVUS) is a useful tool for assessing pre-intervention lesion characteristics and optimising stent implantation.<sup>1</sup> Randomised trials evaluating the utility of IVUS for guiding percutaneous coronary intervention (PCI) with drug-eluting stents (DES) reported conflicting results. Some studies showed better outcomes in patients undergoing IVUS-guided PCI than in those undergoing angiography-guided PCI,<sup>2-7</sup> while others showed comparable outcomes between the two strategies.<sup>8-10</sup> In a meta-analysis of these trials, IVUS-guided PCI, by using established criteria for optimising stent deployment, was associated with a reduction in major adverse cardiac events.<sup>11-14</sup> However, in these trials, angiography guidance was based on visual estimation, and high-pressure post-dilation with a non-compliant balloon was not routinely used after DES implantation. The visual assessment of coronary artery lesions has a high degree of variability, leading to improper stent sizing with suboptimal stent expansion.<sup>15</sup> Although the benefit of IVUS-guided PCI is increasingly recognised, its adoption remains low worldwide.<sup>16</sup> The real barrier to implementing an IVUS program in daily PCI practice is its high cost.<sup>17</sup> IVUS is not affordable for many catheterisation laboratories and patients, particularly in developing countries. Thus, a more practical and standardised algorithmic approach to supporting coronary measurement is necessary. On-line quantitative coronary angiography (QCA) is available at every catheterisation laboratory and enables a reliable assessment of lumen diameter without any additional cost.<sup>18,19</sup> Coronary sizing by on-site QCA may overcome the limitations of visual estimation and aid in deploying the proper DES size.

It is well established that post-procedural minimal lumen diameter determined by angiography, which correlates with the final minimal stent area (MSA) on IVUS, is the key determinant of DES failure.<sup>20,21</sup> Undersizing lumen diameter by visual estimation often leads to the selection of a smaller DES, and the lack of high-pressure post-dilatation with a non-

1  
2  
3 compliant balloon is frequently related to post-procedural residual stenosis.<sup>22</sup> DES failure is  
4  
5 attributable not to the angiography guidance itself but rather to the suboptimal results  
6  
7 associated with underestimated stent sizing by visual estimation and lack of adequate high-  
8  
9 pressure post-dilatation. We hypothesised that choosing the appropriate DES size by a novel  
10  
11 on-site QCA-based algorithm and routine incorporation of high-pressure post-dilatation with an  
12  
13 adequately sized non-compliant balloon may attenuate the disadvantage of the traditional  
14  
15 angiography-guided PCI.  
16  
17  
18  
19  
20  
21

## 22 **METHODS AND ANALYSIS**

### 23 **Study overview and objectives**

24  
25  
26  
27 The Quantitative Coronary Angiography versus Intravascular Ultrasound GUIDancE for  
28  
29 Drug-Eluting Stent Implantation (GUIDE-DES) trial is a prospective, multi-centre, open-  
30  
31 labelled, randomised comparison trial. This trial is investigator-initiated with grant support  
32  
33 from Biotronik (Bülach, Switzerland). Otherwise, the company will not be involved in any  
34  
35 aspect of the study process, including the protocol development, site selection, data  
36  
37 collection, or data analysis. This study is based on the principles outlined in the Declaration  
38  
39 of Helsinki. The primary aim of the trial is to determine whether an on-site QCA-based  
40  
41 strategy for PCI guidance is valid for preventing device-oriented events compared with the  
42  
43 IVUS-based PCI strategy in all-comer patients who require revascularisation therapy for  
44  
45 significant coronary artery disease. The primary analysis will be a noninferiority comparison  
46  
47 of the two strategies for the primary end point of target-lesion failure. The study design is  
48  
49 shown in **Figure 1**.  
50  
51  
52  
53

### 54 **Study population and randomisation**

All consecutive patients with significant native coronary artery disease suitable for DES implantation will be screened for study entry. Patients meeting all the eligibility criteria and providing written informed consent will be included in the study. We will not impose restrictions regarding the clinical diagnosis (angina or acute myocardial infarction) or location, length, or numbers of lesions to validate the QCA-based PCI algorithm in various PCI-indicated patients. However, we will exclude bypass graft lesions, for which QCA is less established, and lesions where IVUS delivery is deemed to be impaired (extreme angulation or tortuosity, heavy calcification proximal to or within the target lesion). Detailed information on the inclusion and exclusion criteria is provided in **Table 1**.

**Table 1. Inclusion and exclusion criteria**

| <b>Inclusion Criteria</b> |                                                                                                                                                                                                                                                |
|---------------------------|------------------------------------------------------------------------------------------------------------------------------------------------------------------------------------------------------------------------------------------------|
| 1.                        | Man or woman at least 18 years of age                                                                                                                                                                                                          |
| 2                         | Typical chest pain or objective evidence of myocardial ischaemia                                                                                                                                                                               |
| 3.                        | Significant stenotic lesions in native coronary arteries* suitable for DES implantation                                                                                                                                                        |
| 4                         | The patient or guardian agrees to the study protocol and the schedule of clinical follow-up and provides written informed consent as approved by the appropriate Institutional Review Board/Ethical Committee of the respective clinical site. |
| <b>Exclusion Criteria</b> |                                                                                                                                                                                                                                                |
|                           | Angiographic exclusion criteria:                                                                                                                                                                                                               |
| 1                         | 1) Bypass graft lesions                                                                                                                                                                                                                        |
|                           | 2) Lesions in which impaired delivery of IVUS is expected:                                                                                                                                                                                     |
|                           | - Extreme angulation ( $\geq 90^\circ$ ) proximal to or within the target lesion.                                                                                                                                                              |
|                           | - Excessive tortuosity (two $\geq 45^\circ$ angles) proximal to or within the target lesion.                                                                                                                                                   |



|    |                                                                                                                                                                                                                                 |
|----|---------------------------------------------------------------------------------------------------------------------------------------------------------------------------------------------------------------------------------|
|    | - Heavy calcification proximal to or within the target lesion.                                                                                                                                                                  |
| 2  | Previous PCI within 6 months before the index procedure                                                                                                                                                                         |
| 3  | Previous bioresorbable vascular scaffold implantation                                                                                                                                                                           |
| 4  | Left ventricular ejection fraction < 30%                                                                                                                                                                                        |
| 5  | Hypersensitivity or contraindication to the device material and its degradants and cobalt, chromium, nickel, platinum, tungsten, acrylic and fluoro polymers that cannot be adequately pre-medicated.                           |
| 6  | Persistent thrombocytopenia (platelet count < 100,000/ $\mu$ L)                                                                                                                                                                 |
| 7  | Any history of haemorrhagic stroke or intracranial haemorrhage, transient ischemic attack, or ischemic stroke within the past 6 months                                                                                          |
| 8  | A known intolerance to antiplatelet agents (aspirin, clopidogrel, prasugrel, or ticagrelor)                                                                                                                                     |
| 9  | Any surgery requiring discontinuation of aspirin and/or use of a P2Y12 inhibitor planned within 12 months after the procedure.                                                                                                  |
| 10 | A diagnosis of cancer (other than superficial squamous or basal cell skin cancer) in the past 3 years or current treatment for the active cancer.                                                                               |
| 11 | Any clinically significant abnormality identified at the screening visit, physical examination, laboratory tests, or electrocardiogram which, in the judgment of the investigator, would preclude safe completion of the study. |
| 12 | A hepatic disease or biliary tract obstruction, or significant hepatic enzyme elevation (alanine transaminase or aspartate transaminase > 3 times the upper limit of normal).                                                   |
| 13 | Life expectancy < 1 year for any non-cardiac or cardiac causes                                                                                                                                                                  |
| 14 | Unwillingness or inability to comply with the procedures described in this protocol.                                                                                                                                            |
| 15 | Pregnant, breast-feeding, or child-bearing potential.                                                                                                                                                                           |

1  
2  
3 DES, drug-eluting stent; IVUS, intravascular ultrasound; PCI, percutaneous coronary  
4 intervention. \*At least 70% diameter stenosis on visual estimation, or 50–69% diameter  
5 stenosis with objective evidence of ischaemia (positive noninvasive stress test or fractional  
6 flow reserve  $\leq 0.8$ )  
7  
8  
9  
10  
11  
12  
13  
14  
15  
16  
17  
18  
19  
20  
21  
22  
23  
24  
25  
26  
27  
28  
29  
30  
31  
32  
33  
34  
35  
36  
37  
38  
39  
40  
41  
42  
43  
44  
45  
46  
47  
48  
49  
50  
51  
52  
53  
54  
55  
56  
57  
58  
59  
60

For peer review only

1  
2  
3 Each patient will receive oral and written information and be required to provide written  
4 informed consent at the time of enrolment. Patients will be randomised in a 1:1 ratio to  
5 undergo a QCA-guided strategy or an IVUS-guided strategy immediately after the guidewire  
6 crosses the culprit lesion. The allocation of the study participants will proceed through an  
7 Interactive Web Response System with a permuted block size of six. A total of 1,528  
8 patients will be enrolled from six high-volume PCI centres in Korea.  
9

## 19 **Study procedure**

### 21 ***QCA-guided strategy***

23 A PCI protocol for the QCA-guided group is summarised in **Figure 2**, and a representative  
24 case is illustrated in **Supplemental Figure 1**. An algorithm for the reference segments'  
25 diameter adjustment in this trial was developed based on the previous reports comparing  
26 lumen measurements between QCA and IVUS.<sup>18,23</sup> Applying this, angiograms of vessels that  
27 are adequately filled with contrast should be obtained after administering intracoronary  
28 nitroglycerin (250–500 µg). The best image that corresponds to the lesion location with the  
29 least foreshortening should be selected. Lumen diameters are measured at the optimal  
30 proximal and distal reference segments by on-site QCA using the automatic calibration  
31 software embedded in the angiography systems. If multiple measurements of QCA are  
32 performed in different views, it is recommended that the largest value be used for the target  
33 diameter calculation. The following formula derives the adjusted QCA value (target  
34 diameter) to guide stent selection and deployment: Adjusted QCA value = measured QCA  
35 value + 5–10% of the measured QCA value. Specifically, the percentage number multiplied  
36 for the adjustment varies according to the measured QCA value: 10% for QCA values ≤ 3.5  
37 mm, 9% for 3.6 mm, 8% for 3.7 mm, 7% for 3.8 mm, 6% for 3.9 mm, and 5% for QCA  
38 values ≥ 4.0 mm. A simple calculation table that can practically be used in the catheterisation  
39  
40  
41  
42  
43  
44  
45  
46  
47  
48  
49  
50  
51  
52  
53  
54  
55  
56  
57  
58  
59  
60

1  
2  
3 lab will be provided to the participating centres (**Supplemental Table 1**). For diffuse disease  
4  
5 without a normal-looking segment for the QCA measurement at a bifurcation site, the use of  
6  
7 Finet's formula is recommended to estimate the reference lumen diameter of the main branch  
8  
9 if applicable (**Supplemental Figure 2**).<sup>24</sup>  
10  
11

12 The stent size is then selected based on the calculated target diameter of the distal  
13  
14 reference segment. The stent length is visually estimated with the aid of a radiopaque  
15  
16 guidewire tip (30 mm) for long lesions or an uninflated balloon (15 or 20 mm) for short  
17  
18 lesions. During stent deployment, the stent balloon should be inflated up to the pressure  
19  
20 corresponding to the distal reference segment's target diameter. Post-stenting optimisation is  
21  
22 mandatory using a non-compliant balloon of proper size considering the target diameter of  
23  
24 the proximal and distal reference segment. Proximal and distal edge optimisation is  
25  
26 performed in which the radiopaque marker of a non-compliant balloon is positioned over the  
27  
28 stent edge and the balloon dilated up to the target diameters (**Supplemental Figure 3**).  
29  
30 Multiple balloon dilations within the stent should be performed until adequate stent  
31  
32 expansion is achieved, preferably assessed by stent boost subtract imaging. If the result is  
33  
34 considered suboptimal, the use of a step-up approach with upsizing post-dilations (previous  
35  
36 ballooning size + about 0.2 mm) is recommended. In patients receiving additional stent  
37  
38 implantation to treat a dissection at the distal stent edge, post-dilation of the overlapping zone  
39  
40 with a balloon adequately sized to the proximal stent is needed to eliminate inter-stent  
41  
42 malapposition at the overlapping site. The ideal final result would be a harmonious  
43  
44 appearance between the reference segment and the stent without dissection and minimal  
45  
46 residual stenosis (<10%) on angiography.<sup>25</sup>  
47  
48  
49  
50  
51  
52  
53  
54  
55

### 56 *IVUS-guided strategy*

57  
58  
59  
60

1  
2  
3 IVUS can be iteratively used at any step of PCI. After the intracoronary injection of  
4 nitroglycerin, the 40-MHz IVUS catheter (Boston Scientific Corporation, Natick, MA, USA)  
5  
6 is advanced more than 5 mm distal to the target lesion and withdrawn at a motorised pullback  
7  
8 speed of 0.5 mm/s. Balloon dilatation at the target lesion is allowed to facilitate the IVUS  
9  
10 catheter passage if necessary. Stent size and length are determined by the online IVUS  
11  
12 measurements. The stent size nearest the distal reference segment's lumen diameter is  
13  
14 selected, and the stent length is decided by measuring the distance from the distal to proximal  
15  
16 reference sites. During stent deployment, the stent balloon should be inflated up to the  
17  
18 pressure corresponding to the mid-wall (or lumen) diameter of the distal reference segment.  
19  
20 Adjunctive high-pressure balloon dilation using a noncompliant balloon is left to the  
21  
22 operator's discretion based on the IVUS findings. The IVUS criteria for stent optimisation in  
23  
24 this trial are as follows: 1) in-stent minimal lumen cross-sectional area > distal reference  
25  
26 segment's lumen cross-sectional area; 2) complete stent apposition; and 3) no significant  
27  
28 edge dissection (media dissection, dissection angle  $\geq 60^\circ$ , or dissection length > 2 mm).<sup>3,26,27</sup>  
29  
30  
31  
32  
33  
34  
35  
36  
37  
38  
39  
40  
41  
42  
43  
44  
45  
46  
47  
48  
49  
50  
51  
52  
53  
54  
55  
56  
57  
58  
59  
60

If the IVUS-defined optimal criteria are not met, additional procedures are needed.

### ***Study stent and medical treatment***

Biodegradable polymer sirolimus-eluting stents (Orsiro or Orsiro Mission, Bülach, Switzerland, Biotronik) will be used in both trial arms. Optimal angioplasty requires compliance with precise guidelines for adjunctive pharmacological therapy. Unless pretreated, all patients should be administered aspirin 300 mg and P2Y12 inhibitors (clopidogrel 600 mg, ticagrelor 180 mg, prasugrel 60 mg) before PCI. Unfractionated heparin must be administered before and during the procedure to maintain an activated clotting time greater than 250 seconds. According to the clinical indication and procedural complexity, dual antiplatelet agents will be prescribed for at least 6–12 months following PCI at the

1  
2  
3 discretion of the attending physician, and either aspirin (100 mg once daily) or clopidogrel  
4  
5 (75 mg once daily) will be continued indefinitely thereafter.  
6  
7

8 Other pharmacological treatments must be optimised early after randomisation in  
9  
10 accordance with the established standards of practice.<sup>28,29</sup> Statins should be prescribed in all  
11  
12 patients during the study period. Beta-blockers, calcium channel blockers, or long-acting  
13  
14 nitrates alone or in combination can be used as anti-ischemic therapy. An angiotensin-  
15  
16 converting enzyme inhibitor or an angiotensin-receptor blocker is considered for secondary  
17  
18 prevention. Blood pressure and diabetic control are emphasised. Patients should receive  
19  
20 counselling about smoking cessation, weight control, and regular exercise.  
21  
22  
23

### 24 25 **Study endpoints and follow-up** 26

27 The primary endpoint is the 12-month cumulative incidence of target-lesion failure defined as  
28  
29 a composite of cardiac death, target-vessel myocardial infarction, or ischaemia-driven target-  
30  
31 lesion revascularisation. Secondary endpoints are the rates of all-cause death, myocardial  
32  
33 infarction, definite or probable stent thrombosis, stroke, target-lesion revascularisation, and  
34  
35 any revascularisation at 12 months and procedural success (**Table 2**). A cost-effectiveness  
36  
37 comparison of QCA- versus IVUS-guided DES implantation will be performed  
38  
39 independently. Procedural success is defined as the achievement of final in-stent residual  
40  
41 stenosis of less than 30% by QCA of at least one stent at the intended target lesion and  
42  
43 successful withdrawal of the delivery system for all target lesions without the occurrence of  
44  
45 cardiac death, target-vessel myocardial infarction, or repeat target-lesion revascularisation  
46  
47 during the hospital stay. All deaths will be considered cardiac unless an unequivocal non-  
48  
49 cardiac cause can be established. Specifically, any unexpected death even in patients with  
50  
51 coexisting potentially fatal non-cardiac disease (e.g., cancer, infection) is classified as  
52  
53 cardiac. The diagnosis of periprocedural myocardial infarction is based on the diagnostic  
54  
55  
56  
57  
58  
59  
60

1  
2  
3 criteria from the Society for Cardiovascular Angiography and Interventions.<sup>30</sup> The diagnosis  
4 of spontaneous myocardial infarction is based on criteria proposed by the Third Universal  
5 Definition of Myocardial Infarction.<sup>31</sup> Stroke is defined as focal loss of neurologic function  
6 caused by an ischemic or haemorrhagic event, with residual symptoms lasting at least 24  
7 hours or leading to death. Target-lesion revascularisation is defined as any repeat PCI of the  
8 target lesion or bypass surgery of the target vessel performed for restenosis or other  
9 complication of the target lesion.  
10  
11  
12  
13  
14  
15  
16  
17  
18  
19  
20  
21

22 **Table 2. Primary and secondary endpoints**

---

23 **Primary endpoint**

- 24 • Target-lesion failure (composite of cardiac death, target vessel myocardial infarction, or  
25 ischaemia-driven target lesion revascularisation) at 12 months after randomisation

26  
27  
28  
29  
30 **Secondary endpoints**

- 31 • Procedural success
  - 32 • Death at 12 months
  - 33 • Myocardial infarction at 12 months
  - 34 • Stent thrombosis (definite/probable) at 12 months
  - 35 • Stroke at 12 months
  - 36 • Target-lesion revascularisation at 12 months
  - 37 • Any revascularisation at 12 months
  - 38 • Economic (cost effectiveness) analysis at 12 months
-

1  
2  
3 Clinical follow-up assessments will be scheduled via clinical visits or telephone  
4 interviews at 1, 6, and 12 months for all patients enrolled in the study. Medical history will be  
5 obtained, while a physical examination and basic laboratory tests will be performed at each  
6 visit. Data collected during the follow-up visits will include ischemic symptoms, bleeding  
7 complications, and major adverse cardiac events, including re-hospitalisation and re-  
8 catheterisation. Angiographic and IVUS images will be collected at the core laboratory of  
9 Asan Medical Center and analysed offline by experts blinded to clinical data.  
10  
11  
12  
13  
14  
15  
16  
17  
18  
19  
20  
21

### 22 **Statistical analysis**

23  
24 This trial will test the hypothesis that QCA-guided PCI is non-inferior to IVUS-guided PCI  
25 concerning the primary end point of cardiac death, target-vessel myocardial infarction, or  
26 ischaemia-driven target vessel revascularisation at 12 months. Based on previous reports of  
27 real-world patients without restrictions regarding the clinical diagnosis; lesion number,  
28 severity, or location; or number of stents used,<sup>32 33</sup> we estimated that the incidence of the  
29 primary endpoint 12 months after the index procedure would be 8% in the IVUS-guided PCI  
30 group. Using a noninferiority margin of 3.5% in accordance with the noninferiority margins  
31 used in contemporary trials of DES and considering a 5% of attrition rate, we estimated that  
32 with a total of 1,528 patients, the study would provide 80% power to show noninferiority on  
33 the basis of the likelihood-score method by Farrington and Manning at a one-sided 0.025  
34 level.<sup>34,35</sup>  
35  
36  
37  
38  
39  
40  
41  
42  
43  
44  
45  
46  
47  
48

49 The analyses will be performed according to the intention-to-treat principle. A  
50 secondary per-protocol analysis will be performed to assess the effect of treatment crossovers  
51 or unanticipated problems that could dilute treatment differences of interest. Continuous  
52 variables will be presented as mean and standard deviation, while categorical variables will  
53 be shown as numbers and percentages. Intergroup differences will be evaluated by Student's  
54  
55  
56  
57  
58  
59  
60



1  
2  
3 t-test or the Wilcoxon rank sum test for continuous variables and by Pearson's  $\chi^2$  test or  
4  
5 Fisher's exact test for categorical variables as appropriate. Cumulative event rates and  
6  
7 survival curves will be generated using the Kaplan-Meier method, while intergroup  
8  
9 differences will be compared by the log-rank test. Follow-up will be censored at the date of  
10  
11 the last follow-up or at 1 year, whichever comes first. Cox's proportional hazards regression  
12  
13 analyses will be conducted to estimate the risk associated with the QCA-guided PCI strategy  
14  
15 relative to that with the IVUS-guided PCI strategy. The proportional hazards assumption  
16  
17 about the assigned treatments will be tested with the Schoenfeld residuals test. A two-sided P  
18  
19 value  $< 0.05$  will indicate significance. SAS software version 9.3 (SAS Institute, Cary, NC,  
20  
21 USA) will be used for all the statistical analyses.  
22  
23  
24  
25  
26  
27

### 28 **Trial organisation**

29  
30 The members of the executive committee include the principal investigators of the  
31  
32 investigating centres and the persons who organised this study. The committee approved the  
33  
34 final trial design and protocol issued to the Data and Safety Monitoring Board (DSMB) and  
35  
36 the clinical sites. The committee will be responsible for reviewing the final results,  
37  
38 determining the methods of presentation and publication, and selecting secondary projects  
39  
40 and publications by members of the steering committee. An independent DSMB committee,  
41  
42 headed by Sung Cheol Yun, will receive information on rates of death, myocardial infarction,  
43  
44 and major bleeding and will make recommendations based on the analyses of safety data,  
45  
46 protocol deviation, IVUS failures, and 30-day follow-up reports. The DSMB chairperson will  
47  
48 notify the data coordinating centre of any safety or compliance issues. The committee will  
49  
50 also provide confidential recommendations as necessary of study termination based on the  
51  
52 safety stopping rules determined at the study onset or when a clinically significant result is  
53  
54 identified in safety analyses of the data. This study will not be stopped early based on  
55  
56  
57  
58  
59  
60

1  
2  
3 efficacy results. The executive committee has right to the final decision to stop the study  
4  
5 prematurely based on DSMB recommendations. All DSMB reports will remain strictly  
6  
7 confidential, but will be made available to the regulatory body upon request. The centralised  
8  
9 Clinical Events Committee (CEC) is made up of interventional and non-interventional  
10  
11 cardiologists who are not participants in the study. The CEC develops specific criteria used to  
12  
13 categorise clinical events in the study that are based on the protocol. At the trial onset, the  
14  
15 CEC will establish clear rules outlining the minimum amount of data required and the  
16  
17 algorithm followed to classify a clinical event. All members of the CEC will be blinded to the  
18  
19 primary results of the trial. Data coordination and site management services will be  
20  
21 performed by the Clinical Research Center of Asan Medical Center, Seoul, Korea.  
22  
23  
24  
25  
26  
27

### 28 **Patient and public involvement**

29  
30 No patient involved.  
31  
32  
33

### 34 **Ethical approval and dissemination**

35  
36 The study protocol was approved by the internal review board of Asan Medical Center,  
37  
38 Seoul, Korea (no. 2017-0060) and each participating centre. The current protocol version is  
39  
40 3.2 date 11 March 2021. The GUIDE-DES trial has been registered at ClinicalTrials.gov  
41  
42 (study identifier no. NCT02978456). The authors are solely responsible for this study's  
43  
44 design and conduct, all study analyses, manuscript drafting and editing, and final manuscript  
45  
46 contents. The study findings will be published in peer-reviewed journal articles and  
47  
48 disseminated through public forums and academic conference presentations. Cost-  
49  
50 effectiveness and secondary imaging analyses will be shared in secondary papers.  
51  
52  
53  
54  
55  
56  
57  
58  
59  
60

## DISCUSSION

With IVUS guidance, acute stent placement can be optimised toward more significant stent expansion and fewer stent edge problems based on the reliable information about vessel size, plaque burden, suboptimal stent deployment, and procedure-related complications. To date, 10 randomised trials have compared IVUS-guided DES implantation with conventional angiographical guidance. In the IVUS group of one trial, the achievement of a minimum stent cross-sectional area greater than the distal reference lumen with IVUS guidance was associated with a 2.9% rate of 1-year major adverse cardiac events versus 5.8% (P = 0.007) with angiography guidance.<sup>3</sup> Another large-scale trial showed that by achieving an MSA > 5.0 mm<sup>2</sup> and avoiding geographic miss, IVUS guidance significantly reduced the rate of target-vessel failure at 1 year.<sup>7</sup> However, despite the accumulating evidence supporting the use of IVUS to improve outcomes after PCI, its use continues to be infrequent worldwide, mostly because of the inaccessibility related to high device cost or image interpretation inexperience.<sup>36</sup> Thus, an overlooked unmet need regarding PCI is to find a way to improve outcomes of DES in a typical circumstance when IVUS is not available.

### **QCA guidance: from core to the catheterisation laboratory**

Previous randomised trials did not provide an objective guide or definition for stent optimisation for the angiography-guided group. Using visual assessment, interventionists tend to choose undersized stents and perform less aggressive post-dilation, leading to suboptimal immediate results and an increased risk of target-lesion failure.<sup>37</sup> QCA has been used to provide quantitative measures of angiography, mostly in clinical studies. The advantage of QCA over visual estimation is that its measurements are objective and relatively reproducible. Furthermore, QCA is easy to use without co-registration or additional cost and is available at every catheterisation laboratory. Unfortunately, it is not commonly used to

1  
2  
3 guide PCI in real-world practice. This trial will test the utility of real-time QCA guidance for  
4  
5  
6 PCI with a goal of incorporating core laboratory experiences into daily clinical practice.

7  
8 In the PROSPECT substudy, there was a strong correlation between minimal lumen  
9  
10 diameters on QCA and IVUS, with underestimation in relatively small arteries (<3.8 mm)  
11  
12 and overestimation in larger arteries (>3.8 mm) with an excellent correlation ( $r = 0.89$ ,  $p <$   
13  
14  $0.001$ ).<sup>23</sup> Optical coherence tomography (OCT) accurately measures lumen diameters  
15  
16 because it produces high-resolution images that are identical to the actual values. The OPUS-  
17  
18 CLASS study showed that QCA underestimates lumen diameters by 5% compared with  
19  
20 OCT, whereas IVUS overestimates lumen diameters by 8% compared with OCT.<sup>18</sup> Therefore  
21  
22 in the present study, we planned to differentially adjust the measured QCA values by 5–10%  
23  
24 to estimate the reference segment's lumen diameter. Inadequate filling of the vessels with  
25  
26 contrast media and coronary artery spasms lead to underestimation of the accurate lumen  
27  
28 dimensions. Thus, taking images of vessels filled with contrast medium after nitroglycerin  
29  
30 injection is recommended to overcome measurement errors. QCA should be repeated if the  
31  
32 coronary lumen dimension increases after pre-dilation of severely stenotic lesions. The  
33  
34 American College of Cardiology/American Heart Association guideline recommends a  
35  
36 minimum residual percent diameter stenosis of <10% by visual estimation after stent  
37  
38 implantation, and this criterion as stent optimisation was adopted in the QCA-guided arm in  
39  
40 our study. The concept of “the bigger, the better” remains valid in the DES era.  
41  
42 Contemporary thin-strut DES may have weaker radial strength and greater recoil with a  
43  
44 smaller lumen area, requiring the need for high-pressure post-dilation to achieve optimal PCI  
45  
46 results.<sup>37</sup> Stent boost subtract imaging allows clear visualisation of the stents and reliable  
47  
48 detection of stent underexpansion.<sup>38</sup> Routine high-pressure post-dilation, preferably guided  
49  
50 by stent boost subtract imaging, will likely lead to minimal residual diameter stenosis with a  
51  
52 low risk of edge problems.<sup>22,39</sup> The GUIDE-DES trial will explore whether incorporating  
53  
54  
55  
56  
57  
58  
59  
60

1  
2  
3 these angiography-based technical considerations into a standardised PCI algorithm may be  
4  
5 an acceptable alternative to IVUS-guided PCI in terms of device-oriented PCI outcomes.  
6  
7  
8  
9

### 10 **Future implications**

11  
12 The success of using QCA for real-time PCI guidance may have significant future  
13  
14 implications along with the development of artificial intelligence technologies. A robust deep  
15  
16 learning model has already been proposed to automatically segment the major vessels on  
17  
18 coronary angiography.<sup>40</sup> With this technique, the image processing time can be minimised  
19  
20 with less manual correction, allowing immediate QCA analysis on the operator screen in the  
21  
22 catheterisation room. Thus, diagnosis with 3-D QCA could be utilised for PCI by combining  
23  
24 the 2-D QCA of multiple angiograms.<sup>41</sup> Further investigations of IVUS-based machine  
25  
26 learning algorithms may lead to outcomes similar to those with IVUS guidance after QCA-  
27  
28 guided PCI.  
29  
30  
31  
32  
33  
34

### 35 **CONCLUSION**

36  
37 The GUIDE-DES trial is the first randomised controlled study to explore the potential use of  
38  
39 a standardised QCA-based PCI algorithm in the clinical context. Because DES failure  
40  
41 frequently depends on the immediate suboptimal stent results based on the visual estimation  
42  
43 of angiography guidance, our study's results may significantly impact many catheterisation  
44  
45 laboratories where IVUS is not available.  
46  
47  
48  
49  
50  
51  
52  
53  
54  
55  
56  
57  
58  
59  
60

1  
2  
3 **Acknowledgments:** We thank all members of this trial group for their ideas, suggestions,  
4 participation, and general assistance. This paper was edited for language by Editage  
5 (www.editage.co.kr).  
6  
7  
8  
9

10 **Author Contributions:** PHL, SWL, and CWL developed the trial concept and wrote the  
11 protocol and the manuscript of the protocol publication. SJH, HSK, YWY, JYL, SJO, SJK,  
12 YHK, and SWP helped to develop the trial concept and revised the manuscript critically for  
13 important intellectual content.  
14  
15  
16  
17  
18

19 **Sources of Funding:** This study is funded by an unrestricted grant from Biotronik, Bülach,  
20 Switzerland (G1709).  
21  
22  
23

24 **Conflict of interest:** None  
25  
26  
27  
28  
29  
30  
31  
32  
33  
34  
35  
36  
37  
38  
39  
40  
41  
42  
43  
44  
45  
46  
47  
48  
49  
50  
51  
52  
53  
54  
55  
56  
57  
58  
59  
60

## REFERENCES

1. Hibi K, Kimura K, Umemura S. Clinical utility and significance of intravascular ultrasound and optical coherence tomography in guiding percutaneous coronary interventions. *Circ J* 2015;79:24-33.
2. Chieffo A, Latib A, Caussin C, et al. A prospective, randomized trial of intravascular-ultrasound guided compared to angiography guided stent implantation in complex coronary lesions: the AVIO trial. *Am Heart J* 2013;165:65-72.
3. Hong SJ, Kim BK, Shin DH, et al. Effect of Intravascular Ultrasound-Guided vs Angiography-Guided Everolimus-Eluting Stent Implantation: The IVUS-XPL Randomized Clinical Trial. *JAMA* 2015;314:2155-63.
4. Tian NL, Gami SK, Ye F, et al. Angiographic and clinical comparisons of intravascular ultrasound- versus angiography-guided drug-eluting stent implantation for patients with chronic total occlusion lesions: two-year results from a randomised AIR-CTO study. *EuroIntervention* 2015;10:1409-17.
5. Tan Q, Wang Q, Liu D, et al. Intravascular ultrasound-guided unprotected left main coronary artery stenting in the elderly. *Saudi Med J* 2015;36:549-53.
6. Mariani J, Jr., Guedes C, Soares P, et al. Intravascular ultrasound guidance to minimize the use of iodine contrast in percutaneous coronary intervention: the MOZART (Minimizing cOntrast utiliZation With IVUS Guidance in coRonary angioplasTy) randomized controlled trial. *JACC Cardiovasc Interv* 2014;7:1287-93.
7. Zhang J, Gao X, Kan J, et al. Intravascular Ultrasound Versus Angiography-Guided Drug-Eluting Stent Implantation: The ULTIMATE Trial. *J Am Coll Cardiol* 2018;72:3126-37.

- 1  
2  
3 8. Jakabcin J, Spacek R, Bystron M, et al. Long-term health outcome and mortality  
4 evaluation after invasive coronary treatment using drug eluting stents with or without  
5 the IVUS guidance. Randomized control trial. HOME DES IVUS. *Catheter*  
6 *Cardiovasc Interv* 2010;75:578-83.  
7  
8  
9
- 10  
11  
12 9. Kim JS, Kang TS, Mintz GS, et al. Randomized comparison of clinical outcomes  
13 between intravascular ultrasound and angiography-guided drug-eluting stent  
14 implantation for long coronary artery stenoses. *JACC Cardiovasc Interv* 2013;6:369-  
15 76.  
16  
17  
18  
19  
20
- 21  
22 10. Kim BK, Shin DH, Hong MK, et al. Clinical Impact of Intravascular Ultrasound-  
23 Guided Chronic Total Occlusion Intervention With Zotarolimus-Eluting Versus  
24 Biolimus-Eluting Stent Implantation: Randomized Study. *Circ Cardiovasc Interv*  
25 2015;8:e002592.  
26  
27  
28  
29
- 30  
31 11. Steinvil A, Zhang YJ, Lee SY, et al. Intravascular ultrasound-guided drug-eluting  
32 stent implantation: An updated meta-analysis of randomized control trials and  
33 observational studies. *Int J Cardiol* 2016;216:133-9.  
34  
35  
36  
37
- 38  
39 12. Elgendy IY, Mahmoud AN, Elgendy AY, et al. Outcomes With Intravascular  
40 Ultrasound-Guided Stent Implantation: A Meta-Analysis of Randomized Trials in the  
41 Era of Drug-Eluting Stents. *Circ Cardiovasc Interv* 2016;9:e003700.  
42  
43  
44
- 45  
46 13. Shin DH, Hong SJ, Mintz GS, et al. Effects of Intravascular Ultrasound-Guided  
47 Versus Angiography-Guided New-Generation Drug-Eluting Stent Implantation:  
48 Meta-Analysis With Individual Patient-Level Data From 2,345 Randomized Patients.  
49 *JACC Cardiovasc Interv* 2016;9:2232-9.  
50  
51  
52  
53
- 54  
55 14. Bavishi C, Sardar P, Chatterjee S, et al. Intravascular ultrasound-guided vs  
56 angiography-guided drug-eluting stent implantation in complex coronary lesions:  
57 Meta-analysis of randomized trials. *Am Heart J* 2017;185:26-34.  
58  
59  
60



- 1  
2  
3 15. Campbell PT, Mahmud E, Marshall JJ. Interoperator and intraoperator (in)accuracy of  
4 stent selection based on visual estimation. *Catheter Cardiovasc Interv* 2015;86:1177-  
5  
6 83.  
7  
8  
9
- 10 16. Smilowitz NR, Mohananey D, Razzouk L, et al. Impact and trends of intravascular  
11 imaging in diagnostic coronary angiography and percutaneous coronary intervention  
12 in inpatients in the United States. *Catheter Cardiovasc Interv* 2018;92:E410-E5.  
13  
14
- 15 17. Mintz GS, Guagliumi G. Intravascular imaging in coronary artery disease. *Lancet*  
16 2017;390:793-809.  
17  
18
- 19 18. Kubo T, Akasaka T, Shite J, et al. OCT compared with IVUS in a coronary lesion  
20 assessment: the OPUS-CLASS study. *JACC Cardiovasc Imaging* 2013;6:1095-104.  
21  
22
- 23 19. Sotomi Y, Onuma Y, Suwannasom P, et al. Is quantitative coronary angiography  
24 reliable in assessing the lumen gain after treatment with the everolimus-eluting  
25 bioresorbable polylactide scaffold? *EuroIntervention* 2016;12:e998-e1008.  
26  
27
- 28 20. Mercado N, Boersma E, Wijns W, et al. Clinical and quantitative coronary  
29 angiographic predictors of coronary restenosis: a comparative analysis from the  
30 balloon-to-stent era. *J Am Coll Cardiol* 2001;38:645-52.  
31  
32
- 33 21. Cassese S, Byrne RA, Tada T, et al. Incidence and predictors of restenosis after  
34 coronary stenting in 10 004 patients with surveillance angiography. *Heart*  
35 2014;100:153-9.  
36  
37
- 38 22. Romagnoli E, Sangiorgi GM, Cosgrave J, et al. Drug-eluting stenting: the case for  
39 post-dilation. *JACC Cardiovasc Interv* 2008;1:22-31.  
40  
41
- 42 23. Goto K, Mintz GS, Litherland C, et al. Lumen Measurements From Quantitative  
43 Coronary Angiography and IVUS: A PROSPECT Substudy. *JACC Cardiovasc*  
44 *Imaging* 2016;9:1011-3.  
45  
46  
47  
48  
49  
50  
51  
52  
53  
54  
55  
56  
57  
58  
59  
60

- 1  
2  
3  
4  
5  
6  
7  
8  
9  
10  
11  
12  
13  
14  
15  
16  
17  
18  
19  
20  
21  
22  
23  
24  
25  
26  
27  
28  
29  
30  
31  
32  
33  
34  
35  
36  
37  
38  
39  
40  
41  
42  
43  
44  
45  
46  
47  
48  
49  
50  
51  
52  
53  
54  
55  
56  
57  
58  
59  
60
24. Finet G, Gilard M, Perrenot B, et al. Fractal geometry of arterial coronary bifurcations: a quantitative coronary angiography and intravascular ultrasound analysis. *EuroIntervention* 2008;3:490-8.
  25. Levine GN, Bates ER, Blankenship JC, et al. 2011 ACCF/AHA/SCAI Guideline for Percutaneous Coronary Intervention. A report of the American College of Cardiology Foundation/American Heart Association Task Force on Practice Guidelines and the Society for Cardiovascular Angiography and Interventions. *J Am Coll Cardiol* 2011;58:e44-122.
  26. Choi SY, Witzembichler B, Maehara A, et al. Intravascular ultrasound findings of early stent thrombosis after primary percutaneous intervention in acute myocardial infarction: a Harmonizing Outcomes with Revascularization and Stents in Acute Myocardial Infarction (HORIZONS-AMI) substudy. *Circ Cardiovasc Interv* 2011;4:239-47.
  27. Cheneau E, Leborgne L, Mintz GS, et al. Predictors of subacute stent thrombosis: results of a systematic intravascular ultrasound study. *Circulation* 2003;108:43-7.
  28. Amsterdam EA, Wenger NK, Brindis RG, et al. 2014 AHA/ACC guideline for the management of patients with non-ST-elevation acute coronary syndromes: a report of the American College of Cardiology/American Heart Association Task Force on Practice Guidelines. *Circulation* 2014;130:e344-426.
  29. Fihn SD, Gardin JM, Abrams J, et al. 2012 ACCF/AHA/ACP/AATS/PCNA/SCAI/STS guideline for the diagnosis and management of patients with stable ischemic heart disease: executive summary: a report of the American College of Cardiology Foundation/American Heart Association task force on practice guidelines, and the American College of Physicians, American Association for Thoracic Surgery, Preventive Cardiovascular

- 1  
2  
3 Nurses Association, Society for Cardiovascular Angiography and Interventions, and  
4 Society of Thoracic Surgeons. *Circulation* 2012;126:3097-137.  
5  
6  
7  
8 30. Moussa ID, Klein LW, Shah B, et al. Consideration of a new definition of clinically  
9 relevant myocardial infarction after coronary revascularization: an expert consensus  
10 document from the Society for Cardiovascular Angiography and Interventions  
11  
12  
13  
14 (SCAI). *Catheter Cardiovasc Interv* 2014;83:27-36.  
15  
16  
17 31. Thygesen K, Alpert JS, Jaffe AS, et al. Third universal definition of myocardial  
18 infarction. *Circulation* 2012;126:2020-35.  
19  
20  
21 32. Silber S, Windecker S, Vranckx P, et al. Unrestricted randomised use of two new  
22 generation drug-eluting coronary stents: 2-year patient-related versus stent-related  
23 outcomes from the RESOLUTE All Comers trial. *Lancet* 2011;377:1241-7.  
24  
25  
26 33. Park DW, Kim YH, Song HG, et al. Outcomes after unrestricted use of everolimus-  
27 eluting and sirolimus-eluting stents in routine clinical practice: a multicenter,  
28 prospective cohort study. *Circ Cardiovasc Interv* 2012;5:365-71.  
29  
30  
31 34. Farrington CP, Manning G. Test statistics and sample size formulae for comparative  
32 binomial trials with null hypothesis of non-zero risk difference or non-unity relative  
33 risk. *Stat Med* 1990;9:1447-54.  
34  
35  
36 35. Ellis SG, Kereiakes DJ, Metzger DC, et al. Everolimus-Eluting Bioresorbable  
37 Scaffolds for Coronary Artery Disease. *N Engl J Med* 2015;373:1905-15.  
38  
39  
40 36. Elgendy IY, Ha LD, Elbadawi A, et al. Temporal Trends in Inpatient Use of  
41 Intravascular Imaging Among Patients Undergoing Percutaneous Coronary  
42 Intervention in the United States. *JACC Cardiovasc Interv* 2018;11:913-5.  
43  
44  
45 37. de Ribamar Costa J, Jr., Mintz GS, Carlier SG, et al. Intravascular ultrasound  
46 assessment of drug-eluting stent expansion. *Am Heart J* 2007;153:297-303.  
47  
48  
49  
50  
51  
52  
53  
54  
55  
56  
57  
58  
59  
60

- 1  
2  
3 38. Mishell JM, Vakharia KT, Ports TA, et al. Determination of adequate coronary stent  
4 expansion using StentBoost, a novel fluoroscopic image processing technique.  
5  
6 *Catheter Cardiovasc Interv* 2007;69:84-93.  
7  
8  
9  
10 39. Brodie BR, Cooper C, Jones M, et al. Is adjunctive balloon postdilatation necessary  
11 after coronary stent deployment? Final results from the POSTIT trial. *Catheter*  
12 *Cardiovasc Interv* 2003;59:184-92.  
13  
14  
15  
16  
17 40. Yang S, Kweon J, Roh JH, et al. Deep learning segmentation of major vessels in X-  
18 ray coronary angiography. *Sci Rep* 2019;9:16897.  
19  
20  
21 41. Tu S, Xu L, Ligthart J, et al. In vivo comparison of arterial lumen dimensions  
22 assessed by co-registered three-dimensional (3D) quantitative coronary angiography,  
23 intravascular ultrasound and optical coherence tomography. *Int J Cardiovasc Imaging*  
24 2012;28:1315-27.  
25  
26  
27  
28  
29  
30  
31  
32  
33  
34  
35  
36  
37  
38  
39  
40  
41  
42  
43  
44  
45  
46  
47  
48  
49  
50  
51  
52  
53  
54  
55  
56  
57  
58  
59  
60

**FIGURE LEGENDS****Figure 1.** Study flow chart

BVS, bioresorbable vascular scaffold; CAD, coronary artery disease; DES, drug-eluting stent; ID-TLR, ischaemia-driven target-lesion revascularisation; IVUS, intravascular ultrasound; LVEF, left ventricular ejection fraction; MI, myocardial infarction; PCI, percutaneous coronary intervention; QCA, quantitative coronary angiography

\*Sirolimus-eluting Orsiro or Orsiro Mission stents were used in this trial.

**Figure 2.** Outline of the QCA-guided PCI strategy

PCI, percutaneous coronary intervention; QCA, quantitative coronary angiography

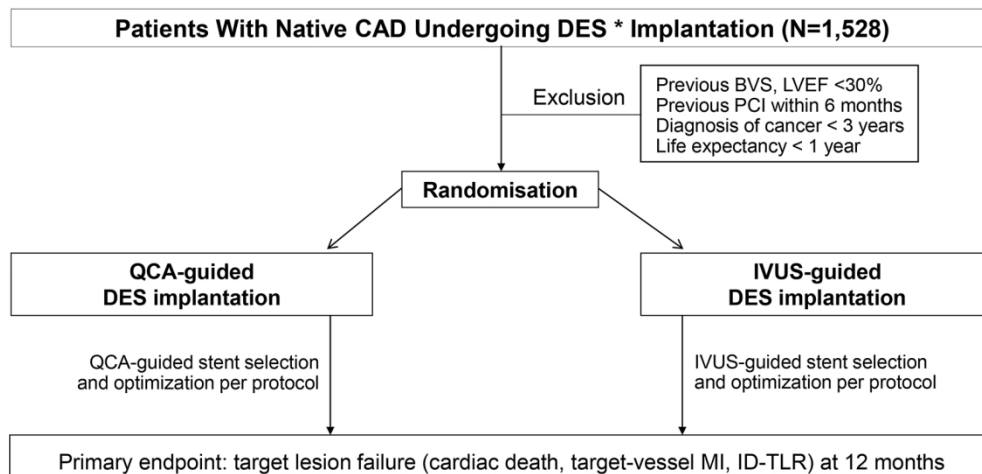

Study flow chart

**Design by angiogram**

- obtain the best angiographic images adequately filled with contrast media
- identify the landing zones (normal or normal-looking area)

**Sizing by QCA**

- measure the lumen diameter at the reference segments by QCA
- calculate the adjusted QCA diameter (target diameter)  
= measured QCA value + 5~10% of the measured QCA value

**Finish by post-dilation**

- Stent selection & deployment: choose the stent size to reach the target diameter of the distal reference segment and inflate the stent balloon up to the target diameter
- Stent optimization at its edge and within the stent: high-pressure post-dilation to achieve minimal residual stenosis (diameter stenosis < 10%) assessed by stent boost imaging

Outline of the QCA-guided PCI strategy

76x50mm (300 x 300 DPI)

## Supplemental Material Online

This Supplementary data has been provided by the authors to give readers additional information about their work.

**Supplemental Table 1.** Adjusted QCA values (target diameters) of the reference segments derived from the QCA measurements

**Supplemental Figure 1.** Representative case of QCA-guided PCI

**Supplemental Figure 2.** Estimation of the main branch size without normal-looking area

**Supplemental Figure 3.** Stent edge optimization



**Supplemental Table 1.** Adjusted QCA values (target diameters) of the reference segments derived from the QCA measurements

| Measured value      | Target diameter | Measured value      | Target diameter |
|---------------------|-----------------|---------------------|-----------------|
| $\leq 3.5\text{mm}$ | + 10%           | 3.6–3.9mm           | + 6~9%          |
| 2.0                 | 2.2             | 3.6                 | 3.92            |
| 2.1                 | 2.31            | 3.7                 | 4.0             |
| 2.2                 | 2.42            | 3.8                 | 4.07            |
| 2.3                 | 2.53            | 3.9                 | 4.13            |
| 2.4                 | 2.64            | $\geq 4.0\text{mm}$ | + 5%            |
| 2.5                 | 2.75            | 4.0                 | 4.2             |
| 2.6                 | 2.86            | 4.1                 | 4.31            |
| 2.7                 | 2.97            | 4.2                 | 4.41            |
| 2.8                 | 3.08            | 4.3                 | 4.52            |
| 2.9                 | 3.19            | 4.4                 | 4.62            |
| 3.0                 | 3.3             | 4.5                 | 4.73            |
| 3.1                 | 3.41            | 4.6                 | 4.83            |
| 3.2                 | 3.52            | 4.7                 | 4.94            |
| 3.3                 | 3.63            | 4.8                 | 5.04            |
| 3.4                 | 3.74            | 4.9                 | 5.15            |
| 3.5                 | 3.85            | 5.0                 | 5.25            |

Supplemental Figure 1. Representative case of QCA-guided PCI

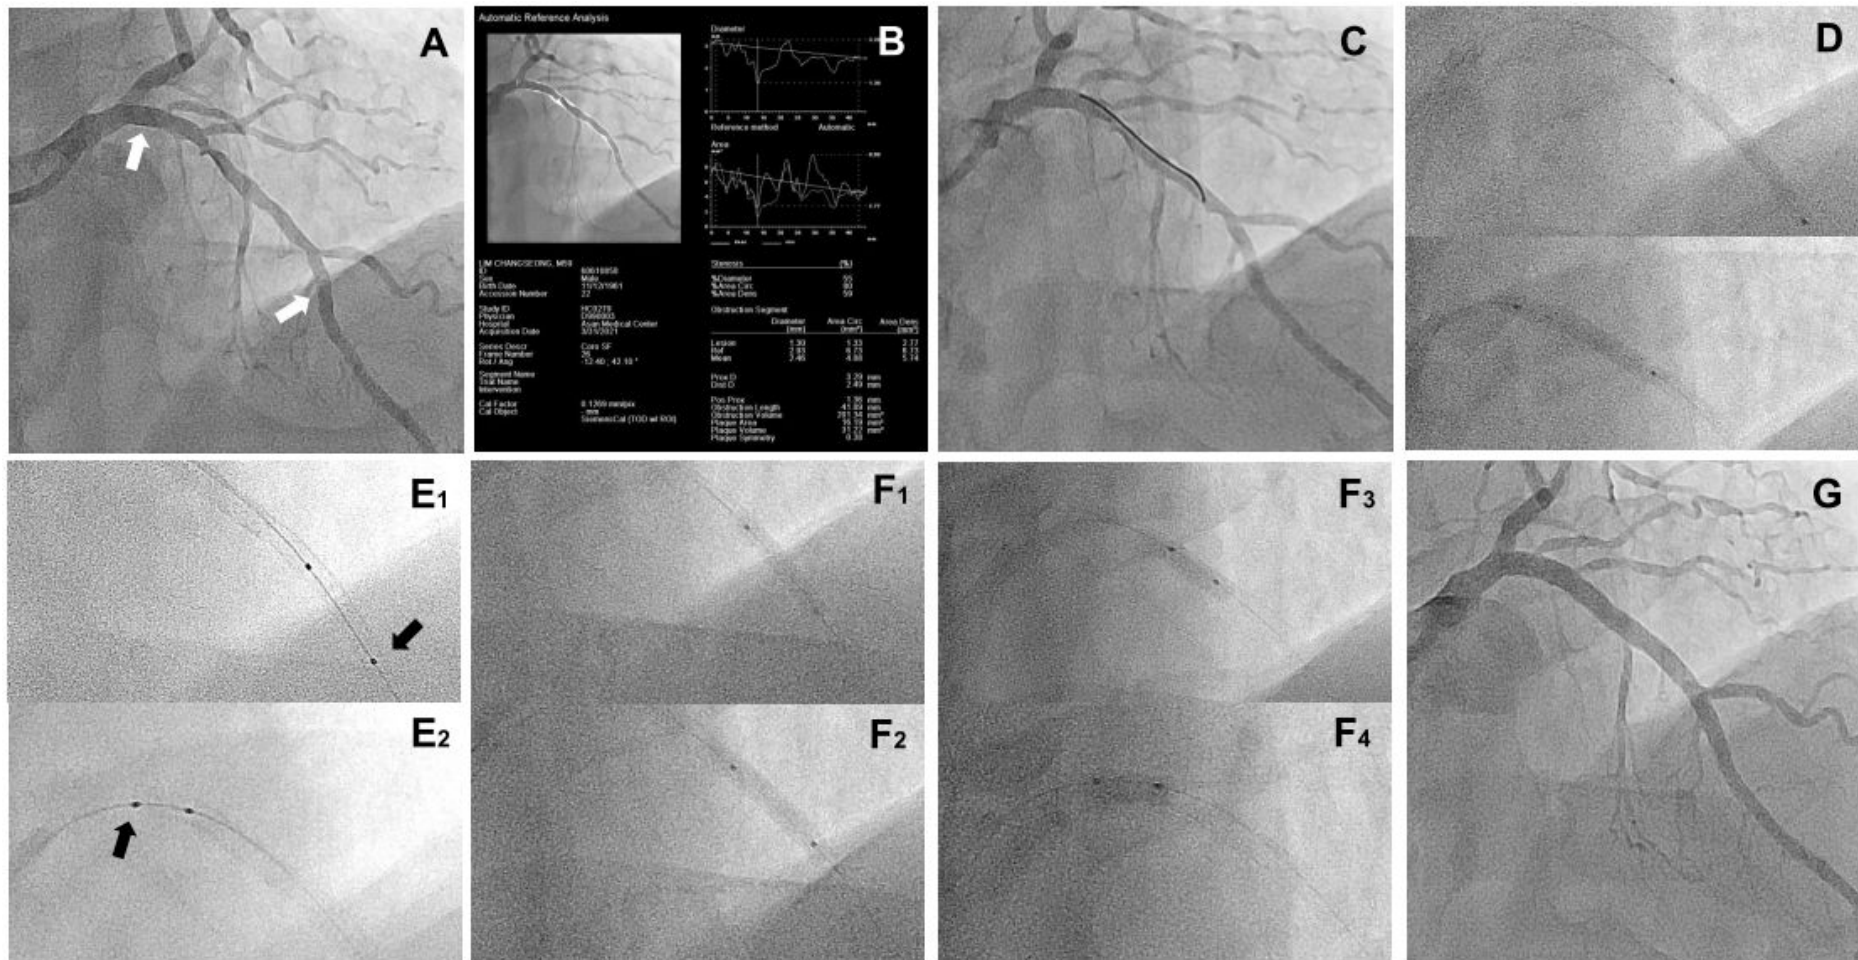

A) Baseline angiogram and identification of the distal and proximal reference segments (arrows), B) QCA measurement of reference diameters (distal reference 2.49mm, proximal reference 3.29mm) and calculation of the adjusted QCA sizes (target diameters: distal reference 2.74mm, proximal reference 3.62mm), C) Estimation of lesion length using 30mm radiopaque tip of the guidewire (about 49mm), D) Stent selection (Orsiro Mission 2.5x26mm stent, Orsiro Mission

1  
2  
3 3.0×26mm stent) and delivery, followed by balloon inflation up to target diameter of the distal reference segment (distal stent, ballooning up to 2.76mm at 15atm;  
4 proximal stent, ballooning up to 3.34mm at 16atm), E) Positioning the radiopaque marker of noncompliant balloons over stent edges guided by stent boost imaging  
5 (arrows: E1, distal stent edge; E2, proximal stent edge), F) Multiple high-pressure balloon dilation using NC balloons to achieve minimal residual stenosis guided by  
6 stent boost imaging: distal stent edge (F1: FORCE™ NC [2.75×15mm], ballooning up to 2.75mm at 12atm), in-stent (F2: FORCE™ NC [2.75×15mm], ballooning  
7 up to 3.11mm at 26atm; F3: NEON™ NC [3.5×10 mm], ballooning up to 3.44mm at 10atm), and proximal stent edge (F4: NEON™ NC [3.5×10 mm], ballooning up  
8 to 3.65mm at 18atm), G) Final angiogram with minimal residual stenosis and smooth transition between the stent edges and the reference segments. Atm,  
9 atmosphere; NC, noncompliant; PCI, percutaneous coronary intervention; QCA, quantitative coronary angiography.  
10  
11  
12  
13  
14  
15  
16  
17  
18  
19  
20  
21  
22  
23  
24  
25  
26  
27  
28  
29  
30  
31  
32  
33  
34  
35  
36  
37  
38  
39  
40  
41  
42  
43  
44  
45  
46

**Supplemental Figure 2.** Estimation of the main branch size without normal-looking area

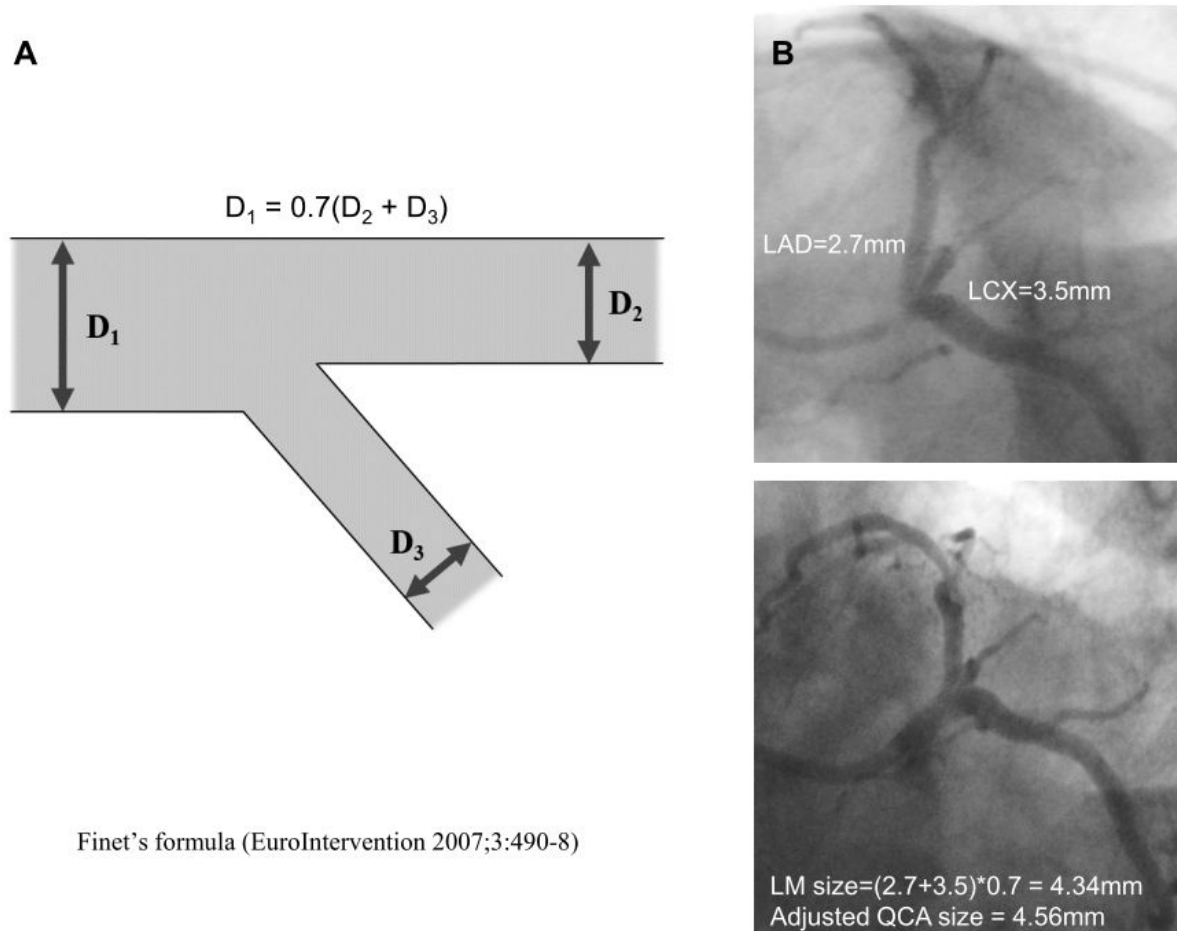

A) If there is no reference zone of the main branch at a bifurcation site, its size is estimated by Finet's formula. B) Angiograms estimating diameter of the LM coronary artery without normal-looking area: distal LM diameter = (diameter of the proximal LAD + diameter of the proximal LCX)  $\times$  0.7. Right upper panel, LM coronary artery stenosis without normal-looking area. Right lower panel, angiogram after LM coronary artery stenting based on the adjusted QCA size.

D, diameter; LAD, left anterior descending coronary artery; LCX, left circumflex coronary artery; LM, left main; QCA, quantitative coronary angiography.

1  
2  
3 **Supplemental Figure 3.** Positioning the radiopaque maker of noncompliant balloon over  
4 stent edge for optimization of the stent edges  
5

6  
7 **A**

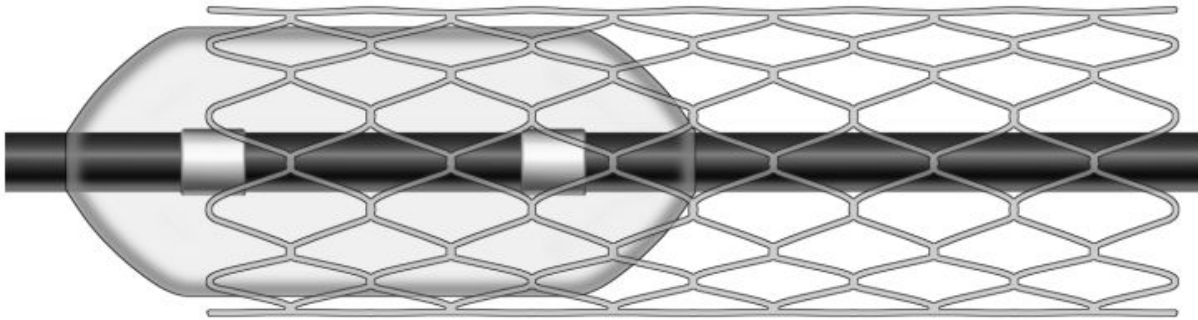

19  
20  
21 **B**

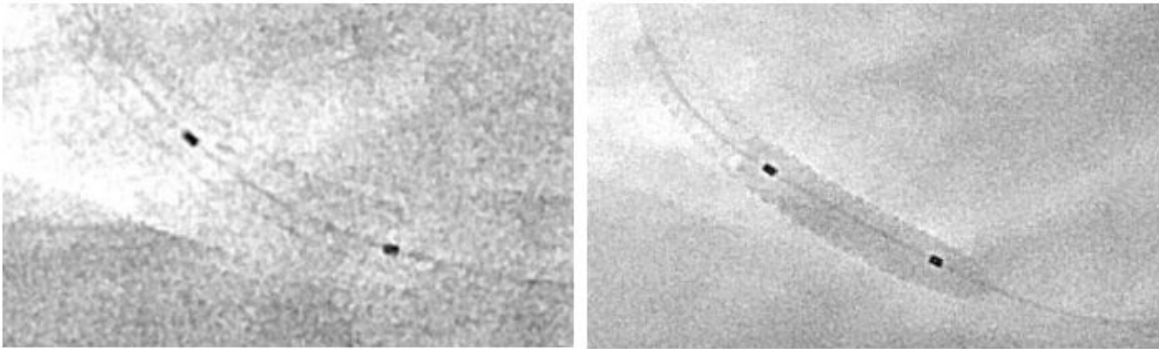

34  
35 A) Schematic illustration, B) Stent boost image. Post-dilations of the proximal and distal stent  
36 edges are separately performed up to each target diameters using high-pressure noncompliant  
37 balloons.  
38  
39

# Reporting checklist for protocol of a clinical trial.

Based on the SPIRIT guidelines.

## Instructions to authors

Complete this checklist by entering the page numbers from your manuscript where readers will find each of the items listed below.

Your article may not currently address all the items on the checklist. Please modify your text to include the missing information. If you are certain that an item does not apply, please write "n/a" and provide a short explanation.

Upload your completed checklist as an extra file when you submit to a journal.

In your methods section, say that you used the SPIRIT reporting guidelines, and cite them as:

Chan A-W, Tetzlaff JM, Gøtzsche PC, Altman DG, Mann H, Berlin J, Dickersin K, Hróbjartsson A, Schulz KF, Parulekar WR, Krleža-Jerić K, Laupacis A, Moher D. SPIRIT 2013 Explanation and Elaboration: Guidance for protocols of clinical trials. *BMJ*. 2013;346:e7586

|                                   |                                                                                                                                 | Page Number |
|-----------------------------------|---------------------------------------------------------------------------------------------------------------------------------|-------------|
| <b>Administrative information</b> |                                                                                                                                 |             |
| Title                             | <a href="#">#1</a> Descriptive title identifying the study design, population, interventions, and, if applicable, trial acronym | 1           |

|    |                     |                     |                                                            |      |
|----|---------------------|---------------------|------------------------------------------------------------|------|
| 1  | Trial registration  | <a href="#">#2a</a> | Trial identifier and registry name. If not yet registered, | 2    |
| 2  |                     |                     | name of intended registry                                  |      |
| 3  |                     |                     |                                                            |      |
| 4  |                     |                     |                                                            |      |
| 5  |                     |                     |                                                            |      |
| 6  | Trial registration: | <a href="#">#2b</a> | All items from the World Health Organization Trial         | 2    |
| 7  |                     |                     |                                                            |      |
| 8  | data set            |                     | Registration Data Set                                      |      |
| 9  |                     |                     |                                                            |      |
| 10 |                     |                     |                                                            |      |
| 11 |                     |                     |                                                            |      |
| 12 | Protocol version    | <a href="#">#3</a>  | Date and version identifier                                | 16   |
| 13 |                     |                     |                                                            |      |
| 14 |                     |                     |                                                            |      |
| 15 | Funding             | <a href="#">#4</a>  | Sources and types of financial, material, and other        | 20   |
| 16 |                     |                     | support                                                    |      |
| 17 |                     |                     |                                                            |      |
| 18 |                     |                     |                                                            |      |
| 19 |                     |                     |                                                            |      |
| 20 | Roles and           | <a href="#">#5a</a> | Names, affiliations, and roles of protocol contributors    | 1,20 |
| 21 |                     |                     |                                                            |      |
| 22 | responsibilities:   |                     |                                                            |      |
| 23 |                     |                     |                                                            |      |
| 24 | contributorship     |                     |                                                            |      |
| 25 |                     |                     |                                                            |      |
| 26 |                     |                     |                                                            |      |
| 27 |                     |                     |                                                            |      |
| 28 | Roles and           | <a href="#">#5b</a> | Name and contact information for the trial sponsor         | 5    |
| 29 |                     |                     |                                                            |      |
| 30 | responsibilities:   |                     |                                                            |      |
| 31 |                     |                     |                                                            |      |
| 32 | sponsor contact     |                     |                                                            |      |
| 33 |                     |                     |                                                            |      |
| 34 | information         |                     |                                                            |      |
| 35 |                     |                     |                                                            |      |
| 36 |                     |                     |                                                            |      |
| 37 |                     |                     |                                                            |      |
| 38 | Roles and           | <a href="#">#5c</a> | Role of study sponsor and funders, if any, in study        | 5    |
| 39 |                     |                     | design; collection, management, analysis, and              |      |
| 40 | responsibilities:   |                     | interpretation of data; writing of the report; and the     |      |
| 41 |                     |                     | decision to submit the report for publication, including   |      |
| 42 | sponsor and funder  |                     | whether they will have ultimate authority over any of      |      |
| 43 |                     |                     | these activities                                           |      |
| 44 |                     |                     |                                                            |      |
| 45 |                     |                     |                                                            |      |
| 46 |                     |                     |                                                            |      |
| 47 |                     |                     |                                                            |      |
| 48 |                     |                     |                                                            |      |
| 49 |                     |                     |                                                            |      |
| 50 |                     |                     |                                                            |      |
| 51 |                     |                     |                                                            |      |
| 52 | Roles and           | <a href="#">#5d</a> | Composition, roles, and responsibilities of the            | 15   |
| 53 |                     |                     | coordinating centre, steering committee, endpoint          |      |
| 54 | responsibilities:   |                     | adjudication committee, data management team, and          |      |
| 55 |                     |                     |                                                            |      |
| 56 | committees          |                     |                                                            |      |
| 57 |                     |                     |                                                            |      |
| 58 |                     |                     |                                                            |      |
| 59 |                     |                     |                                                            |      |
| 60 |                     |                     |                                                            |      |

other individuals or groups overseeing the trial, if applicable (see Item 21a for data monitoring committee)

## Introduction

|                                                 |                     |                                                                                                                                                                                                            |    |
|-------------------------------------------------|---------------------|------------------------------------------------------------------------------------------------------------------------------------------------------------------------------------------------------------|----|
| Background and rationale                        | <a href="#">#6a</a> | Description of research question and justification for undertaking the trial, including summary of relevant studies (published and unpublished) examining benefits and harms for each intervention         | 4  |
| Background and rationale: choice of comparators | <a href="#">#6b</a> | Explanation for choice of comparators                                                                                                                                                                      | 5  |
| Objectives                                      | <a href="#">#7</a>  | Specific objectives or hypotheses                                                                                                                                                                          | 14 |
| Trial design                                    | <a href="#">#8</a>  | Description of trial design including type of trial (eg, parallel group, crossover, factorial, single group), allocation ratio, and framework (eg, superiority, equivalence, non-inferiority, exploratory) | 5  |
| <b>Methods:</b>                                 |                     |                                                                                                                                                                                                            |    |
| Participants, interventions, and outcomes       |                     |                                                                                                                                                                                                            |    |
| Study setting                                   | <a href="#">#9</a>  | Description of study settings (eg, community clinic, academic hospital) and list of countries where data will be collected. Reference to where list of study sites can be obtained                         | 9  |



|    |                      |                      |                                                              |       |
|----|----------------------|----------------------|--------------------------------------------------------------|-------|
| 1  | Eligibility criteria | <a href="#">#10</a>  | Inclusion and exclusion criteria for participants. If        | 6-7   |
| 2  |                      |                      |                                                              |       |
| 3  |                      |                      | applicable, eligibility criteria for study centres and       |       |
| 4  |                      |                      | individuals who will perform the interventions (eg,          |       |
| 5  |                      |                      | surgeons, psychotherapists)                                  |       |
| 6  |                      |                      |                                                              |       |
| 7  |                      |                      |                                                              |       |
| 8  |                      |                      |                                                              |       |
| 9  |                      |                      |                                                              |       |
| 10 |                      |                      |                                                              |       |
| 11 | Interventions:       | <a href="#">#11a</a> | Interventions for each group with sufficient detail to allow | 9-10  |
| 12 |                      |                      |                                                              |       |
| 13 | description          |                      | replication, including how and when they will be             |       |
| 14 |                      |                      | administered                                                 |       |
| 15 |                      |                      |                                                              |       |
| 16 |                      |                      |                                                              |       |
| 17 |                      |                      |                                                              |       |
| 18 |                      |                      |                                                              |       |
| 19 | Interventions:       | <a href="#">#11b</a> | Criteria for discontinuing or modifying allocated            | 11    |
| 20 |                      |                      |                                                              |       |
| 21 | modifications        |                      | interventions for a given trial participant (eg, drug dose   |       |
| 22 |                      |                      | change in response to harms, participant request, or         |       |
| 23 |                      |                      | improving / worsening disease)                               |       |
| 24 |                      |                      |                                                              |       |
| 25 |                      |                      |                                                              |       |
| 26 |                      |                      |                                                              |       |
| 27 |                      |                      |                                                              |       |
| 28 |                      |                      |                                                              |       |
| 29 | Interventions:       | <a href="#">#11c</a> | Strategies to improve adherence to intervention protocols,   | 9-11  |
| 30 |                      |                      |                                                              |       |
| 31 | adherence            |                      | and any procedures for monitoring adherence (eg, drug        |       |
| 32 |                      |                      | tablet return; laboratory tests)                             |       |
| 33 |                      |                      |                                                              |       |
| 34 |                      |                      |                                                              |       |
| 35 |                      |                      |                                                              |       |
| 36 | Interventions:       | <a href="#">#11d</a> | Relevant concomitant care and interventions that are         | 11-12 |
| 37 |                      |                      |                                                              |       |
| 38 | concomitant care     |                      | permitted or prohibited during the trial                     |       |
| 39 |                      |                      |                                                              |       |
| 40 |                      |                      |                                                              |       |
| 41 |                      |                      |                                                              |       |
| 42 | Outcomes             | <a href="#">#12</a>  | Primary, secondary, and other outcomes, including the        | 12-13 |
| 43 |                      |                      | specific measurement variable (eg, systolic blood            |       |
| 44 |                      |                      | pressure), analysis metric (eg, change from baseline, final  |       |
| 45 |                      |                      | value, time to event), method of aggregation (eg, median,    |       |
| 46 |                      |                      | proportion), and time point for each outcome. Explanation    |       |
| 47 |                      |                      | of the clinical relevance of chosen efficacy and harm        |       |
| 48 |                      |                      | outcomes is strongly recommended                             |       |
| 49 |                      |                      |                                                              |       |
| 50 |                      |                      |                                                              |       |
| 51 |                      |                      |                                                              |       |
| 52 |                      |                      |                                                              |       |
| 53 |                      |                      |                                                              |       |
| 54 |                      |                      |                                                              |       |
| 55 |                      |                      |                                                              |       |
| 56 |                      |                      |                                                              |       |
| 57 |                      |                      |                                                              |       |
| 58 |                      |                      |                                                              |       |
| 59 |                      |                      |                                                              |       |
| 60 |                      |                      |                                                              |       |

|    |                           |                      |                                                            |       |
|----|---------------------------|----------------------|------------------------------------------------------------|-------|
| 1  | Participant timeline      | <a href="#">#13</a>  | Time schedule of enrolment, interventions (including any   | 14    |
| 2  |                           |                      | run-ins and washouts), assessments, and visits for         |       |
| 3  |                           |                      | participants. A schematic diagram is highly recommended    |       |
| 4  |                           |                      | (see Figure)                                               |       |
| 5  |                           |                      |                                                            |       |
| 6  |                           |                      |                                                            |       |
| 7  |                           |                      |                                                            |       |
| 8  |                           |                      |                                                            |       |
| 9  |                           |                      |                                                            |       |
| 10 |                           |                      |                                                            |       |
| 11 | Sample size               | <a href="#">#14</a>  | Estimated number of participants needed to achieve         | 14    |
| 12 |                           |                      | study objectives and how it was determined, including      |       |
| 13 |                           |                      | clinical and statistical assumptions supporting any sample |       |
| 14 |                           |                      | size calculations                                          |       |
| 15 |                           |                      |                                                            |       |
| 16 |                           |                      |                                                            |       |
| 17 |                           |                      |                                                            |       |
| 18 |                           |                      |                                                            |       |
| 19 |                           |                      |                                                            |       |
| 20 |                           |                      |                                                            |       |
| 21 | Recruitment               | <a href="#">#15</a>  | Strategies for achieving adequate participant enrolment to | 15-16 |
| 22 |                           |                      | reach target sample size                                   |       |
| 23 |                           |                      |                                                            |       |
| 24 |                           |                      |                                                            |       |
| 25 |                           |                      |                                                            |       |
| 26 | <b>Methods:</b>           |                      |                                                            |       |
| 27 |                           |                      |                                                            |       |
| 28 | <b>Assignment of</b>      |                      |                                                            |       |
| 29 | <b>interventions (for</b> |                      |                                                            |       |
| 30 | <b>controlled trials)</b> |                      |                                                            |       |
| 31 |                           |                      |                                                            |       |
| 32 |                           |                      |                                                            |       |
| 33 |                           |                      |                                                            |       |
| 34 |                           |                      |                                                            |       |
| 35 |                           |                      |                                                            |       |
| 36 | Allocation: sequence      | <a href="#">#16a</a> | Method of generating the allocation sequence (eg,          | 9     |
| 37 | generation                |                      | computer-generated random numbers), and list of any        |       |
| 38 |                           |                      | factors for stratification. To reduce predictability of a  |       |
| 39 |                           |                      | random sequence, details of any planned restriction (eg,   |       |
| 40 |                           |                      | blocking) should be provided in a separate document that   |       |
| 41 |                           |                      | is unavailable to those who enrol participants or assign   |       |
| 42 |                           |                      | interventions                                              |       |
| 43 |                           |                      |                                                            |       |
| 44 |                           |                      |                                                            |       |
| 45 |                           |                      |                                                            |       |
| 46 |                           |                      |                                                            |       |
| 47 |                           |                      |                                                            |       |
| 48 |                           |                      |                                                            |       |
| 49 |                           |                      |                                                            |       |
| 50 |                           |                      |                                                            |       |
| 51 |                           |                      |                                                            |       |
| 52 |                           |                      |                                                            |       |
| 53 | Allocation                | <a href="#">#16b</a> | Mechanism of implementing the allocation sequence (eg,     | 9     |
| 54 | concealment               |                      | central telephone; sequentially numbered, opaque,          |       |
| 55 |                           |                      |                                                            |       |
| 56 |                           |                      |                                                            |       |
| 57 |                           |                      |                                                            |       |
| 58 | mechanism                 |                      |                                                            |       |
| 59 |                           |                      |                                                            |       |
| 60 |                           |                      |                                                            |       |

sealed envelopes), describing any steps to conceal the sequence until interventions are assigned

Allocation: [#16c](#) Who will generate the allocation sequence, who will enrol participants, and who will assign participants to interventions 9

Blinding (masking) [#17a](#) Who will be blinded after assignment to interventions (eg, trial participants, care providers, outcome assessors, data analysts), and how 9

Blinding (masking): [#17b](#) If blinded, circumstances under which unblinding is permissible, and procedure for revealing a participant's allocated intervention during the trial 9

**Methods: Data collection, management, and analysis**

Data collection plan [#18a](#) Plans for assessment and collection of outcome, baseline, and other trial data, including any related processes to promote data quality (eg, duplicate measurements, training of assessors) and a description of study instruments (eg, questionnaires, laboratory tests) along with their reliability and validity, if known. Reference to where data collection forms can be found, if not in the protocol 14

|    |                            |                      |                                                                |       |
|----|----------------------------|----------------------|----------------------------------------------------------------|-------|
| 1  | Data collection plan:      | <a href="#">#18b</a> | Plans to promote participant retention and complete            | 14    |
| 2  |                            |                      |                                                                |       |
| 3  | retention                  |                      | follow-up, including list of any outcome data to be            |       |
| 4  |                            |                      | collected for participants who discontinue or deviate from     |       |
| 5  |                            |                      | intervention protocols                                         |       |
| 6  |                            |                      |                                                                |       |
| 7  |                            |                      |                                                                |       |
| 8  |                            |                      |                                                                |       |
| 9  |                            |                      |                                                                |       |
| 10 |                            |                      |                                                                |       |
| 11 | Data management            | <a href="#">#19</a>  | Plans for data entry, coding, security, and storage,           | 14    |
| 12 |                            |                      | including any related processes to promote data quality        |       |
| 13 |                            |                      | (eg, double data entry; range checks for data values).         |       |
| 14 |                            |                      | Reference to where details of data management                  |       |
| 15 |                            |                      | procedures can be found, if not in the protocol                |       |
| 16 |                            |                      |                                                                |       |
| 17 |                            |                      |                                                                |       |
| 18 |                            |                      |                                                                |       |
| 19 |                            |                      |                                                                |       |
| 20 |                            |                      |                                                                |       |
| 21 |                            |                      |                                                                |       |
| 22 |                            |                      |                                                                |       |
| 23 | Statistics: outcomes       | <a href="#">#20a</a> | Statistical methods for analysing primary and secondary        | 14-15 |
| 24 |                            |                      | outcomes. Reference to where other details of the              |       |
| 25 |                            |                      | statistical analysis plan can be found, if not in the protocol |       |
| 26 |                            |                      |                                                                |       |
| 27 |                            |                      |                                                                |       |
| 28 |                            |                      |                                                                |       |
| 29 |                            |                      |                                                                |       |
| 30 |                            |                      |                                                                |       |
| 31 | Statistics: additional     | <a href="#">#20b</a> | Methods for any additional analyses (eg, subgroup and          | 14-15 |
| 32 | analyses                   |                      | adjusted analyses)                                             |       |
| 33 |                            |                      |                                                                |       |
| 34 |                            |                      |                                                                |       |
| 35 |                            |                      |                                                                |       |
| 36 | Statistics: analysis       | <a href="#">#20c</a> | Definition of analysis population relating to protocol non-    | 14    |
| 37 | population and             |                      | adherence (eg, as randomised analysis), and any                |       |
| 38 | missing data               |                      | statistical methods to handle missing data (eg, multiple       |       |
| 39 |                            |                      | imputation)                                                    |       |
| 40 |                            |                      |                                                                |       |
| 41 |                            |                      |                                                                |       |
| 42 |                            |                      |                                                                |       |
| 43 |                            |                      |                                                                |       |
| 44 |                            |                      |                                                                |       |
| 45 |                            |                      |                                                                |       |
| 46 | <b>Methods: Monitoring</b> |                      |                                                                |       |
| 47 |                            |                      |                                                                |       |
| 48 |                            |                      |                                                                |       |
| 49 | Data monitoring:           | <a href="#">#21a</a> | Composition of data monitoring committee (DMC);                | 15-16 |
| 50 | formal committee           |                      | summary of its role and reporting structure; statement of      |       |
| 51 |                            |                      | whether it is independent from the sponsor and                 |       |
| 52 |                            |                      | competing interests; and reference to where further            |       |
| 53 |                            |                      |                                                                |       |
| 54 |                            |                      |                                                                |       |
| 55 |                            |                      |                                                                |       |
| 56 |                            |                      |                                                                |       |
| 57 |                            |                      |                                                                |       |
| 58 |                            |                      |                                                                |       |
| 59 |                            |                      |                                                                |       |
| 60 |                            |                      |                                                                |       |

1 details about its charter can be found, if not in the  
 2  
 3 protocol. Alternatively, an explanation of why a DMC is  
 4  
 5 not needed  
 6  
 7

|    |                      |                      |                                                              |       |
|----|----------------------|----------------------|--------------------------------------------------------------|-------|
| 8  | Data monitoring:     | <a href="#">#21b</a> | Description of any interim analyses and stopping             | 15-16 |
| 9  |                      |                      |                                                              |       |
| 10 | interim analysis     |                      | guidelines, including who will have access to these          |       |
| 11 |                      |                      |                                                              |       |
| 12 |                      |                      | interim results and make the final decision to terminate     |       |
| 13 |                      |                      |                                                              |       |
| 14 |                      |                      | the trial                                                    |       |
| 15 |                      |                      |                                                              |       |
| 16 |                      |                      |                                                              |       |
| 17 |                      |                      |                                                              |       |
| 18 | Harms                | <a href="#">#22</a>  | Plans for collecting, assessing, reporting, and managing     | 15-16 |
| 19 |                      |                      |                                                              |       |
| 20 |                      |                      | solicited and spontaneously reported adverse events and      |       |
| 21 |                      |                      |                                                              |       |
| 22 |                      |                      | other unintended effects of trial interventions or trial     |       |
| 23 |                      |                      |                                                              |       |
| 24 |                      |                      | conduct                                                      |       |
| 25 |                      |                      |                                                              |       |
| 26 |                      |                      |                                                              |       |
| 27 |                      |                      |                                                              |       |
| 28 | Auditing             | <a href="#">#23</a>  | Frequency and procedures for auditing trial conduct, if      | 15-16 |
| 29 |                      |                      |                                                              |       |
| 30 |                      |                      | any, and whether the process will be independent from        |       |
| 31 |                      |                      |                                                              |       |
| 32 |                      |                      | investigators and the sponsor                                |       |
| 33 |                      |                      |                                                              |       |
| 34 |                      |                      |                                                              |       |
| 35 | <b>Ethics and</b>    |                      |                                                              |       |
| 36 |                      |                      |                                                              |       |
| 37 | <b>dissemination</b> |                      |                                                              |       |
| 38 |                      |                      |                                                              |       |
| 39 |                      |                      |                                                              |       |
| 40 |                      |                      |                                                              |       |
| 41 | Research ethics      | <a href="#">#24</a>  | Plans for seeking research ethics committee / institutional  | 16    |
| 42 |                      |                      |                                                              |       |
| 43 | approval             |                      | review board (REC / IRB) approval                            |       |
| 44 |                      |                      |                                                              |       |
| 45 |                      |                      |                                                              |       |
| 46 | Protocol             | <a href="#">#25</a>  | Plans for communicating important protocol modifications     | 16    |
| 47 |                      |                      |                                                              |       |
| 48 | amendments           |                      | (eg, changes to eligibility criteria, outcomes, analyses) to |       |
| 49 |                      |                      |                                                              |       |
| 50 |                      |                      | relevant parties (eg, investigators, REC / IRBs, trial       |       |
| 51 |                      |                      |                                                              |       |
| 52 |                      |                      | participants, trial registries, journals, regulators)        |       |
| 53 |                      |                      |                                                              |       |
| 54 |                      |                      |                                                              |       |
| 55 |                      |                      |                                                              |       |
| 56 |                      |                      |                                                              |       |
| 57 |                      |                      |                                                              |       |
| 58 |                      |                      |                                                              |       |
| 59 |                      |                      |                                                              |       |
| 60 |                      |                      |                                                              |       |

|    |                       |                      |                                                                |       |
|----|-----------------------|----------------------|----------------------------------------------------------------|-------|
| 1  | Consent or assent     | <a href="#">#26a</a> | Who will obtain informed consent or assent from potential      | 6,9   |
| 2  |                       |                      | trial participants or authorised surrogates, and how (see      |       |
| 3  |                       |                      | Item 32)                                                       |       |
| 4  |                       |                      |                                                                |       |
| 5  |                       |                      |                                                                |       |
| 6  |                       |                      |                                                                |       |
| 7  |                       |                      |                                                                |       |
| 8  |                       |                      |                                                                |       |
| 9  | Consent or assent:    | <a href="#">#26b</a> | Additional consent provisions for collection and use of        | 6,9   |
| 10 |                       |                      | participant data and biological specimens in ancillary         |       |
| 11 | ancillary studies     |                      | studies, if applicable                                         |       |
| 12 |                       |                      |                                                                |       |
| 13 |                       |                      |                                                                |       |
| 14 |                       |                      |                                                                |       |
| 15 |                       |                      |                                                                |       |
| 16 | Confidentiality       | <a href="#">#27</a>  | How personal information about potential and enrolled          | 16    |
| 17 |                       |                      | participants will be collected, shared, and maintained in      |       |
| 18 |                       |                      | order to protect confidentiality before, during, and after     |       |
| 19 |                       |                      | the trial                                                      |       |
| 20 |                       |                      |                                                                |       |
| 21 |                       |                      |                                                                |       |
| 22 |                       |                      |                                                                |       |
| 23 |                       |                      |                                                                |       |
| 24 |                       |                      |                                                                |       |
| 25 |                       |                      |                                                                |       |
| 26 | Declaration of        | <a href="#">#28</a>  | Financial and other competing interests for principal          | 20    |
| 27 |                       |                      | investigators for the overall trial and each study site        |       |
| 28 | interests             |                      |                                                                |       |
| 29 |                       |                      |                                                                |       |
| 30 |                       |                      |                                                                |       |
| 31 |                       |                      |                                                                |       |
| 32 | Data access           | <a href="#">#29</a>  | Statement of who will have access to the final trial           | 16    |
| 33 |                       |                      | dataset, and disclosure of contractual agreements that         |       |
| 34 |                       |                      | limit such access for investigators                            |       |
| 35 |                       |                      |                                                                |       |
| 36 |                       |                      |                                                                |       |
| 37 |                       |                      |                                                                |       |
| 38 |                       |                      |                                                                |       |
| 39 | Ancillary and post    | <a href="#">#30</a>  | Provisions, if any, for ancillary and post-trial care, and for | 15-16 |
| 40 |                       |                      | compensation to those who suffer harm from trial               |       |
| 41 | trial care            |                      | participation                                                  |       |
| 42 |                       |                      |                                                                |       |
| 43 |                       |                      |                                                                |       |
| 44 |                       |                      |                                                                |       |
| 45 |                       |                      |                                                                |       |
| 46 |                       |                      |                                                                |       |
| 47 | Dissemination policy: | <a href="#">#31a</a> | Plans for investigators and sponsor to communicate trial       | 16    |
| 48 |                       |                      | results to participants, healthcare professionals, the         |       |
| 49 | trial results         |                      | public, and other relevant groups (eg, via publication,        |       |
| 50 |                       |                      | reporting in results databases, or other data sharing          |       |
| 51 |                       |                      | arrangements), including any publication restrictions          |       |
| 52 |                       |                      |                                                                |       |
| 53 |                       |                      |                                                                |       |
| 54 |                       |                      |                                                                |       |
| 55 |                       |                      |                                                                |       |
| 56 |                       |                      |                                                                |       |
| 57 |                       |                      |                                                                |       |
| 58 |                       |                      |                                                                |       |
| 59 |                       |                      |                                                                |       |
| 60 |                       |                      |                                                                |       |

1 Dissemination policy: [#31b](#) Authorship eligibility guidelines and any intended use of 16  
 2  
 3 authorship professional writers  
 4  
 5

6 Dissemination policy: [#31c](#) Plans, if any, for granting public access to the full 16  
 7  
 8 reproducible protocol, participant-level dataset, and statistical code  
 9  
 10 research  
 11  
 12

## 13 Appendices

14  
 15  
 16  
 17 Informed consent [#32](#) Model consent form and other related documentation NA  
 18  
 19 materials given to participants and authorised surrogates  
 20  
 21

22  
 23 Biological specimens [#33](#) Plans for collection, laboratory evaluation, and storage of NA  
 24  
 25 biological specimens for genetic or molecular analysis in  
 26  
 27 the current trial and for future use in ancillary studies, if  
 28  
 29 applicable  
 30  
 31

32  
 33 None The SPIRIT Explanation and Elaboration paper is distributed under the terms of the Creative  
 34  
 35 Commons Attribution License CC-BY-NC. This checklist can be completed online using  
 36  
 37 <https://www.goodreports.org/>, a tool made by the [EQUATOR Network](#) in collaboration with  
 38  
 39 [Penelope.ai](#)  
 40  
 41  
 42  
 43  
 44  
 45  
 46  
 47  
 48  
 49  
 50  
 51  
 52  
 53  
 54  
 55  
 56  
 57  
 58  
 59  
 60

# BMJ Open

## Quantitative coronary angiography versus intravascular ultrasound guidance for drug-eluting stent implantation (GUIDE-DES): study protocol for a randomised controlled non-inferiority trial

|                                 |                                                                                                                                                                                                                                                                                                                                                                                                                                                                        |
|---------------------------------|------------------------------------------------------------------------------------------------------------------------------------------------------------------------------------------------------------------------------------------------------------------------------------------------------------------------------------------------------------------------------------------------------------------------------------------------------------------------|
| Journal:                        | <i>BMJ Open</i>                                                                                                                                                                                                                                                                                                                                                                                                                                                        |
| Manuscript ID                   | bmjopen-2021-052215.R1                                                                                                                                                                                                                                                                                                                                                                                                                                                 |
| Article Type:                   | Protocol                                                                                                                                                                                                                                                                                                                                                                                                                                                               |
| Date Submitted by the Author:   | 17-Sep-2021                                                                                                                                                                                                                                                                                                                                                                                                                                                            |
| Complete List of Authors:       | Lee, Pil Hyung; Asan Medical Center, Cardiology<br>Hong, Soon Jun; Korea University Anam Hospital, Department of Cardiology<br>Kim, Hyun-Sook<br>Yoon, Young won<br>Lee, Jong-Young<br>Oh, Seung-Jin<br>Kang, Soo-Jin; Asan Medical Center, Cardiology<br>Kim, Young-Hak; Asan Medical Center, Cardiology<br>Park, Seong-Wook; Asan Medical Center, Cardiology<br>Lee, Seung-Whan; Asan Medical Center, Cardiology<br>Lee, Cheol Whan; Asan Medical Center, Cardiology |
| <b>Primary Subject Heading</b>: | Cardiovascular medicine                                                                                                                                                                                                                                                                                                                                                                                                                                                |
| Secondary Subject Heading:      | Cardiovascular medicine, Patient-centred medicine                                                                                                                                                                                                                                                                                                                                                                                                                      |
| Keywords:                       | Coronary heart disease < CARDIOLOGY, Coronary intervention < CARDIOLOGY, Ischaemic heart disease < CARDIOLOGY                                                                                                                                                                                                                                                                                                                                                          |
|                                 |                                                                                                                                                                                                                                                                                                                                                                                                                                                                        |

SCHOLARONE™  
Manuscripts



1  
2  
3  
4 **Protocol Paper**

5  
6 **Quantitative coronary angiography versus intravascular ultrasound**  
7  
8 **guidance for drug-eluting stent implantation (GUIDE-DES): study protocol**  
9  
10 **for a randomised controlled non-inferiority trial**  
11  
12

13  
14 Pil Hyung Lee<sup>1</sup>, MD; Soon Jun Hong<sup>2</sup>, MD; Hyun-Sook Kim<sup>3</sup>, MD; Young won Yoon<sup>4</sup>, MD;  
15 Jong-Young Lee<sup>5</sup>, MD; Seung-Jin Oh<sup>6</sup>, MD; Soo-Jin Kang<sup>1</sup>, MD, Young-Hak Kim<sup>1</sup>, MD;  
16 Seong-Wook Park<sup>1</sup>, MD, Seung-Whan Lee<sup>1</sup>, MD; Cheol-Whan Lee<sup>1</sup>; The GUIDE-DES Trial  
17 Research Group  
18  
19  
20  
21

22  
23 <sup>1</sup>Division of Cardiology, Department of Internal Medicine, Asan Medical Center, University  
24 of Ulsan College of Medicine, Seoul, Korea; <sup>2</sup>Department of Cardiology, Cardiovascular  
25 Center, Korea University Anam Hospital, Seoul, Korea; <sup>3</sup>Department of Cardiology, Hallym  
26 University Sacred Heart Hospital, Anyang, Korea; <sup>4</sup>Division of Cardiology, Gangnam  
27 Severance Hospital, Yonsei University College of Medicine, Seoul, Korea; <sup>5</sup>Division of  
28 Cardiology, Department of Internal Medicine, Kangbuk Samsung Hospital, Sungkyunkwan  
29 University School of Medicine, Seoul, Korea; <sup>6</sup>Department of Cardiology, National Health  
30 Insurance Service Ilsan Hospital, Gyeonggi-do, Korea  
31  
32  
33  
34  
35  
36  
37  
38

39 **Keywords:** coronary artery disease, intravascular ultrasound, percutaneous coronary  
40 intervention, quantitative coronary angiography  
41  
42  
43

44 **Total word count:** 3,735  
45

46 **Address for correspondence:**  
47

48 **Drs. Cheol Whan Lee and Seung-Whan Lee**  
49

50  
51 Division of Cardiology, Department of Internal Medicine, Asan Medical Center, University  
52 of Ulsan, 88, Olympic-ro 43-gil, Songpa-gu, Seoul 138-736, Korea  
53

54  
55 Tel: +82-2-3010-3150; Fax: +82-2-486-5918  
56

57  
58 E-mail: [cheolwlee@amc.seoul.kr](mailto:cheolwlee@amc.seoul.kr) and [seungwlee@amc.seoul.kr](mailto:seungwlee@amc.seoul.kr)  
59

## ABSTRACT

**Introduction:** Angiography remains the gold standard for guiding percutaneous coronary intervention (PCI). However, it is prone to suboptimal stent results due to the visual estimation of coronary measurements. Although the benefit of intravascular ultrasound (IVUS)-guided PCI is becoming increasingly recognised, IVUS is not affordable for many catheterisation laboratories. Thus, a more practical and standardised angiography-based approach is necessary to support stent implantation.

**Methods and analysis:** The Quantitative Coronary Angiography versus Intravascular Ultrasound Guidance for Drug-Eluting Stent Implantation (GUIDE-DES) trial is a randomised, investigator-initiated, multi-centre, open-label, non-inferiority trial comparing the quantitative coronary angiography (QCA)-guided PCI strategy with IVUS-guided PCI in all-comer patients with significant coronary artery disease. A novel, standardized, QCA-based PCI protocol for the QCA-guided group will be provided to all participating operators, while the PCI optimisation criteria will be predefined for both strategies. A total of 1,528 patients will be randomised to either group at a 1:1 ratio. The primary endpoint is the 12-month cumulative incidence of target-lesion failure defined as a composite of cardiac death, target-vessel myocardial infarction, or ischaemia-driven target-lesion revascularisation. Clinical follow-up assessments are scheduled at 1, 6, and 12 months for all patients enrolled in the study.

**Ethics and dissemination:** Ethics approval for this study was granted by the Institutional Review Board of Asan Medical Center (no. 2017-0060). Informed consent will be obtained from every participant. The study findings will be published in peer-reviewed journal articles and disseminated through public forums and academic conference presentations. Cost-effectiveness and secondary imaging analyses will be shared in secondary papers.

1  
2  
3 **Clinical Trial Registration:** Clinicaltrials.gov (identifier: NCT02978456)  
4  
5

6  
7 **Article Summary**  
8

9 **Strengths and limitations of this study**  
10

- 11  
12 ➤ For the first time, the GUIDE-DES trial will evaluate the potential of standardized QCA-  
13 based PCI algorithm into clinical context.  
14  
15  
16  
17 ➤ A practical protocol of QCA-guided PCI has been developed for the trial.  
18  
19 ➤ The trial uses a pragmatic design with inclusion criteria designed to capture a broad  
20 range of real-world patients with diverse clinical and anatomical features.  
21  
22  
23  
24 ➤ Bias in event ascertainment may not be ruled out given the open-label trial design.  
25  
26  
27  
28  
29  
30  
31  
32  
33  
34  
35  
36  
37  
38  
39  
40  
41  
42  
43  
44  
45  
46  
47  
48  
49  
50  
51  
52  
53  
54  
55  
56  
57  
58  
59  
60

## INTRODUCTION

Intravascular ultrasound (IVUS) is a useful tool for assessing pre-intervention lesion characteristics and optimising stent implantation.<sup>1</sup> Randomised trials evaluating the utility of IVUS for guiding percutaneous coronary intervention (PCI) with drug-eluting stents (DES) over the conventional angiography-based PCI reported conflicting results. Some studies showed better outcomes in patients undergoing IVUS-guided PCI than in those undergoing angiography-guided PCI,<sup>2-7</sup> while others showed comparable outcomes between the two strategies.<sup>8-10</sup> In a meta-analysis of these trials, IVUS-guided PCI, by using established criteria for optimising stent deployment, was associated with a reduction in major adverse cardiac events.<sup>11-14</sup> However, in these trials, angiography guidance was based on visual estimation, and high-pressure post-dilation with a non-compliant balloon was not routinely used after DES implantation. The visual assessment of coronary artery lesions has a high degree of variability, leading to improper stent sizing with suboptimal stent expansion.<sup>15</sup> Although the benefit of IVUS-guided PCI is increasingly recognised, its adoption remains low worldwide.<sup>16</sup> The real barrier to implementing an IVUS program in daily PCI practice is its high cost.<sup>17</sup> IVUS is not affordable for many catheterisation laboratories and patients, particularly in developing countries. Thus, a more practical and standardised algorithmic approach to supporting coronary measurement is necessary. On-line quantitative coronary angiography (QCA) is available at every catheterisation laboratory and enables a reliable assessment of lumen diameter without any additional cost.<sup>18,19</sup> Coronary sizing by on-site QCA may overcome the limitations of visual estimation and aid in deploying the proper DES size.

It is well established that post-procedural minimal lumen diameter determined by angiography, which correlates with the final minimal stent area (MSA) on IVUS, is the key determinant of DES failure.<sup>20,21</sup> Undersizing lumen diameter by visual estimation often leads

1  
2  
3 to the selection of a smaller DES, and the lack of high-pressure post-dilatation with a non-  
4 compliant balloon is frequently related to post-procedural residual stenosis.<sup>22</sup> DES failure is  
5 attributable not to the angiography guidance itself but rather to the suboptimal results  
6 associated with underestimated stent sizing by visual estimation and lack of adequate high-  
7 pressure post-dilatation. We hypothesised that choosing the appropriate DES size by a novel  
8 on-site QCA-based algorithm and routine incorporation of high-pressure post-dilatation with an  
9 adequately sized non-compliant balloon may attenuate the disadvantage of the traditional  
10 angiography-guided PCI.  
11  
12  
13  
14  
15  
16  
17  
18  
19  
20  
21  
22  
23

## 24 **METHODS AND ANALYSIS**

### 25 **Study overview and objectives**

26  
27  
28  
29  
30 The Quantitative Coronary Angiography versus Intravascular Ultrasound GUIDancE for  
31 Drug-Eluting Stent Implantation (GUIDE-DES) trial is a prospective, multi-centre, open-  
32 labelled, randomised comparison trial. This trial is investigator-initiated with grant support  
33 from Biotronik (Bülach, Switzerland). Otherwise, the company will not be involved in any  
34 aspect of the study process, including the protocol development, site selection, data  
35 collection, or data analysis. This study is based on the principles outlined in the Declaration  
36 of Helsinki. The primary aim of the trial is to determine whether an on-site QCA-based  
37 strategy for PCI guidance is valid for preventing device-oriented events compared with the  
38 IVUS-based PCI strategy in all-comer patients who require revascularisation therapy for  
39 significant coronary artery disease. The primary analysis will be a non-inferiority comparison  
40 of the two strategies for the primary end point of target-lesion failure. The study design is  
41 shown in **Figure 1**.  
42  
43  
44  
45  
46  
47  
48  
49  
50  
51  
52  
53  
54  
55  
56  
57  
58  
59  
60

## Study population and randomisation

All consecutive patients with significant native coronary artery disease suitable for DES implantation will be screened for study entry. Patients meeting all the eligibility criteria and providing written informed consent will be included in the study. We will not impose restrictions regarding the clinical diagnosis (chronic or acute coronary syndrome) or location, length, or numbers of lesions to validate the QCA-based PCI algorithm in various PCI-indicated patients. However, we will exclude bypass graft lesions, for which QCA is less established, and lesions where IVUS delivery is deemed to be impaired (extreme angulation or tortuosity, heavy calcification proximal to or within the target lesion). Detailed information on the inclusion and exclusion criteria is provided in **Table 1**.

**Table 1. Inclusion and exclusion criteria**

| <b>Inclusion Criteria</b> |                                                                                                                                                                                                                                                |
|---------------------------|------------------------------------------------------------------------------------------------------------------------------------------------------------------------------------------------------------------------------------------------|
| 1.                        | Man or woman at least 18 years of age                                                                                                                                                                                                          |
| 2                         | Typical chest pain or objective evidence of myocardial ischaemia                                                                                                                                                                               |
| 3.                        | Significant stenotic lesions in native coronary arteries* suitable for DES implantation                                                                                                                                                        |
| 4                         | The patient or guardian agrees to the study protocol and the schedule of clinical follow-up and provides written informed consent as approved by the appropriate Institutional Review Board/Ethical Committee of the respective clinical site. |
| <b>Exclusion Criteria</b> |                                                                                                                                                                                                                                                |
| 1                         | Angiographic exclusion criteria:<br>1) Bypass graft lesions<br>2) Lesions in which impaired delivery of IVUS is expected:<br>- Extreme angulation ( $\geq 90^\circ$ ) proximal to or within the target lesion.                                 |

|    |                                                                                                                                                                                                                                   |
|----|-----------------------------------------------------------------------------------------------------------------------------------------------------------------------------------------------------------------------------------|
|    | <ul style="list-style-type: none"> <li>- Excessive tortuosity (two <math>\geq 45^\circ</math> angles) proximal to or within the target lesion.</li> <li>- Heavy calcification proximal to or within the target lesion.</li> </ul> |
| 2  | Previous PCI within 6 months before the index procedure                                                                                                                                                                           |
| 3  | Previous bioresorbable vascular scaffold implantation                                                                                                                                                                             |
| 4  | Left ventricular ejection fraction < 30%                                                                                                                                                                                          |
| 5  | Hypersensitivity or contraindication to the device material and its degradants and cobalt, chromium, nickel, platinum, tungsten, acrylic and fluoro polymers that cannot be adequately pre-medicated.                             |
| 6  | Persistent thrombocytopenia (platelet count < 100,000/ $\mu$ L)                                                                                                                                                                   |
| 7  | Any history of haemorrhagic stroke or intracranial haemorrhage, transient ischemic attack, or ischemic stroke within the past 6 months                                                                                            |
| 8  | A known intolerance to antiplatelet agents (aspirin, clopidogrel, prasugrel, or ticagrelor)                                                                                                                                       |
| 9  | Any surgery requiring discontinuation of aspirin and/or use of a P2Y12 inhibitor planned within 12 months after the procedure.                                                                                                    |
| 10 | A diagnosis of cancer (other than superficial squamous or basal cell skin cancer) in the past 3 years or current treatment for the active cancer.                                                                                 |
| 11 | Any clinically significant abnormality identified at the screening visit, physical examination, laboratory tests, or electrocardiogram which, in the judgment of the investigator, would preclude safe completion of the study.   |
| 12 | A hepatic disease or biliary tract obstruction, or significant hepatic enzyme elevation (alanine transaminase or aspartate transaminase > 3 times the upper limit of normal).                                                     |
| 13 | Life expectancy < 1 year for any non-cardiac or cardiac causes                                                                                                                                                                    |
| 14 | Unwillingness or inability to comply with the procedures described in this protocol.                                                                                                                                              |
| 15 | Pregnant, breast-feeding, or child-bearing potential.                                                                                                                                                                             |

1  
2  
3 DES, drug-eluting stent; IVUS, intravascular ultrasound; PCI, percutaneous coronary  
4 intervention. \*At least 70% diameter stenosis on visual estimation, or 50–69% diameter  
5 stenosis with objective evidence of ischaemia (positive noninvasive stress test or fractional  
6 flow reserve  $\leq 0.8$ )  
7  
8  
9  
10  
11  
12  
13  
14  
15  
16  
17  
18  
19  
20  
21  
22  
23  
24  
25  
26  
27  
28  
29  
30  
31  
32  
33  
34  
35  
36  
37  
38  
39  
40  
41  
42  
43  
44  
45  
46  
47  
48  
49  
50  
51  
52  
53  
54  
55  
56  
57  
58  
59  
60

For peer review only



1  
2  
3 Each patient will receive oral and written information and be required to provide written  
4 informed consent at the time of enrolment. Patients will be randomised in a 1:1 ratio to  
5 undergo a QCA-guided strategy or an IVUS-guided strategy immediately after the guidewire  
6 crosses the culprit lesion. The allocation of the study participants will proceed through an  
7 Interactive Web Response System with a permuted block size of six. A total of 1,528  
8 patients will be enrolled from six high-volume PCI centres in Korea.  
9

## 19 **Study procedure**

### 21 ***QCA-guided strategy***

23 A PCI protocol for the QCA-guided group is summarised in **Figure 2**, and a representative  
24 case is illustrated in **Supplemental Figure 1**. An algorithm for the reference segments'  
25 diameter adjustment in this trial was developed based on the previous reports comparing  
26 lumen measurements between QCA and IVUS.<sup>18,23</sup> Applying this, angiograms of vessels that  
27 are adequately filled with contrast should be obtained after administering intracoronary  
28 nitroglycerin (250–500 µg). The best image that corresponds to the lesion location with the  
29 least foreshortening should be selected. Lumen diameters are measured at the optimal  
30 proximal and distal reference segments by on-site QCA using the automatic calibration  
31 software embedded in the angiography systems. If multiple measurements of QCA are  
32 performed in different views, it is recommended that the largest value be used for the target  
33 diameter calculation. The following formula derives the adjusted QCA value (target  
34 diameter) to guide stent selection and deployment: Adjusted QCA value = measured QCA  
35 value + 5–10% of the measured QCA value. Specifically, the percentage number multiplied  
36 for the adjustment varies according to the measured QCA value: 10% for QCA values ≤ 3.5  
37 mm, 9% for 3.6 mm, 8% for 3.7 mm, 7% for 3.8 mm, 6% for 3.9 mm, and 5% for QCA  
38 values ≥ 4.0 mm. A simple calculation table that can practically be used in the catheterisation  
39  
40  
41  
42  
43  
44  
45  
46  
47  
48  
49  
50  
51  
52  
53  
54  
55  
56  
57  
58  
59  
60

1  
2  
3 lab will be provided to the participating centres (**Supplemental Table 1**). For diffuse disease  
4  
5 without a normal-looking segment for the QCA measurement at a bifurcation site, the use of  
6  
7 Finet's formula is recommended to estimate the reference lumen diameter of the main branch  
8  
9 if applicable (**Supplemental Figure 2**).<sup>24</sup>  
10  
11

12 The stent size is then selected based on the calculated target diameter of the distal  
13  
14 reference segment. The stent length is visually estimated with the aid of a radiopaque  
15  
16 guidewire tip (30 mm) for long lesions or an uninflated balloon (15 or 20 mm) for short  
17  
18 lesions. During stent deployment, the stent balloon should be inflated up to the pressure  
19  
20 corresponding to the distal reference segment's target diameter. Post-stenting optimisation is  
21  
22 mandatory using a non-compliant balloon of proper size considering the target diameter of  
23  
24 the proximal and distal reference segment. Proximal and distal edge optimisation is  
25  
26 performed in which the radiopaque marker of a non-compliant balloon is positioned over the  
27  
28 stent edge and the balloon dilated up to the target diameters (**Supplemental Figure 3**).  
29  
30 Multiple balloon dilations within the stent should be performed until adequate stent  
31  
32 expansion is achieved, preferably assessed by stent boost subtract imaging. If the result is  
33  
34 considered suboptimal, the use of a step-up approach with upsizing post-dilations (previous  
35  
36 ballooning size + about 0.2 mm) is recommended. In patients receiving additional stent  
37  
38 implantation to treat a dissection at the distal stent edge, post-dilation of the overlapping zone  
39  
40 with a balloon adequately sized to the proximal stent is needed to eliminate inter-stent  
41  
42 malapposition at the overlapping site. This QCA-based PCI algorithm is applicable to main  
43  
44 epicardial arteries and side branches and can also be used for the 2-stent technique. The ideal  
45  
46 final result would be a harmonious appearance between the reference segment and the stent  
47  
48 without dissection and minimal residual stenosis (<10%) on angiography.<sup>25</sup>  
49  
50  
51  
52  
53  
54  
55  
56  
57

### 58 *IVUS-guided strategy*

1  
2  
3 IVUS can be iteratively used at any step of PCI. After the intracoronary injection of  
4 nitroglycerin, the 40-MHz IVUS catheter (Boston Scientific Corporation, Natick, MA, USA)  
5  
6 is advanced more than 5 mm distal to the target lesion and withdrawn at a motorised pullback  
7  
8 speed of 0.5 mm/s. Balloon dilatation at the target lesion is allowed to facilitate the IVUS  
9  
10 catheter passage if necessary. Stent size and length are determined by the online IVUS  
11  
12 measurements. The stent size nearest the distal reference segment's lumen diameter is  
13  
14 selected, and the stent length is decided by measuring the distance from the distal to proximal  
15  
16 reference sites. During stent deployment, the stent balloon should be inflated up to the  
17  
18 pressure corresponding to the mid-wall (or lumen) diameter of the distal reference segment.  
19  
20 Adjunctive high-pressure balloon dilation using a noncompliant balloon is left to the  
21  
22 operator's discretion based on the IVUS findings. It is mandatory to perform IVUS after PCI  
23  
24 to assess stent optimisation. The IVUS criteria for stent optimisation in this trial are as  
25  
26 follows: 1) in-stent minimal lumen cross-sectional area > distal reference segment's lumen  
27  
28 cross-sectional area; 2) complete stent apposition; and 3) no significant proximal or distal  
29  
30 edge dissection (media dissection, dissection angle  $\geq 60^\circ$ , or dissection length > 2 mm).<sup>3,26,27</sup>  
31  
32  
33  
34  
35  
36  
37 If the IVUS-defined optimal criteria are not met, additional procedures are needed.  
38  
39  
40  
41

### 42 ***Study stent and medical treatment***

44 Biodegradable polymer sirolimus-eluting stents (Orsiro or Orsiro Mission, Bülach,  
45  
46 Switzerland, Biotronik) will be used in both trial arms. Optimal angioplasty requires  
47  
48 compliance with precise guidelines for adjunctive pharmacological therapy. Unless  
49  
50 pretreated, all patients should be administered aspirin 300 mg and P2Y12 inhibitors  
51  
52 (clopidogrel 600 mg, ticagrelor 180 mg, prasugrel 60 mg) before PCI. Unfractionated heparin  
53  
54 must be administered before and during the procedure to maintain an activated clotting time  
55  
56 greater than 250 seconds. According to the clinical indication and procedural complexity,  
57  
58  
59  
60

1  
2  
3 dual antiplatelet agents will be prescribed for at least 6–12 months following PCI at the  
4 discretion of the attending physician, and either aspirin (100 mg once daily) or clopidogrel  
5  
6 (75 mg once daily) will be continued indefinitely thereafter.  
7  
8  
9

10 Other pharmacological treatments must be optimised early after randomisation in  
11 accordance with the established standards of practice.<sup>28,29</sup> Statins should be prescribed in all  
12 patients during the study period. Beta-blockers, calcium channel blockers, or long-acting  
13 nitrates alone or in combination can be used as anti-ischemic therapy. An angiotensin-  
14 converting enzyme inhibitor or an angiotensin-receptor blocker is considered for secondary  
15 prevention. Blood pressure and diabetic control are emphasised. Patients should receive  
16 counselling about smoking cessation, weight control, and regular exercise.  
17  
18  
19  
20  
21  
22  
23  
24  
25  
26

### 27 **Study endpoints and follow-up**

28  
29 The primary endpoint is the 12-month cumulative incidence of target-lesion failure defined as  
30 a composite of cardiac death, target-vessel myocardial infarction, or ischaemia-driven target-  
31 lesion revascularisation. Secondary endpoints are the rates of all-cause death, myocardial  
32 infarction, definite or probable stent thrombosis, stroke, target-lesion revascularisation, and  
33 any revascularisation at 12 months and procedural success (**Table 2**). A cost-effectiveness  
34 comparison of QCA- versus IVUS-guided DES implantation will be performed  
35 independently. Procedural success is defined as the achievement of final in-stent residual  
36 stenosis of less than 30% by QCA of at least one stent at the intended target lesion and  
37 successful withdrawal of the delivery system for all target lesions without the occurrence of  
38 cardiac death, target-vessel myocardial infarction, or repeat target-lesion revascularisation  
39 during the hospital stay. All deaths will be considered cardiac unless an unequivocal non-  
40 cardiac cause can be established. Specifically, any unexpected death even in patients with  
41 coexisting potentially fatal non-cardiac disease (e.g., cancer, infection) is classified as  
42  
43  
44  
45  
46  
47  
48  
49  
50  
51  
52  
53  
54  
55  
56  
57  
58  
59  
60

1  
2  
3 cardiac. The diagnosis of periprocedural myocardial infarction is based on the diagnostic  
4 criteria from the Society for Cardiovascular Angiography and Interventions.<sup>30</sup> The diagnosis  
5 of spontaneous myocardial infarction is based on criteria proposed by the Third Universal  
6 Definition of Myocardial Infarction.<sup>31</sup> Stroke is defined as focal loss of neurologic function  
7 caused by an ischemic or haemorrhagic event, with residual symptoms lasting at least 24  
8 hours or leading to death. Target-lesion revascularisation is defined as any repeat PCI of the  
9 target lesion or bypass surgery of the target vessel performed for restenosis or other  
10 complication of the target lesion.  
11  
12  
13  
14  
15  
16  
17  
18  
19  
20  
21  
22  
23

24 **Table 2. Primary and secondary endpoints**

---

26 **Primary endpoint**

- 27 • Target-lesion failure (composite of cardiac death, target vessel myocardial infarction, or  
28 ischaemia-driven target lesion revascularisation) at 12 months after randomisation  
29  
30  
31  
32

33 **Secondary endpoints**

- 34 • Procedural success  
35  
36  
37 • Death at 12 months  
38  
39  
40 • Myocardial infarction at 12 months  
41  
42 • Stent thrombosis (definite/probable) at 12 months  
43  
44 • Stroke at 12 months  
45  
46 • Target-lesion revascularisation at 12 months  
47  
48 • Any revascularisation at 12 months  
49  
50 • Economic (cost effectiveness) analysis at 12 months  
51  
52  
53
-

1  
2  
3 Clinical follow-up assessments will be scheduled via clinical visits or telephone  
4 interviews at 1, 6, and 12 months for all patients enrolled in the study. Medical history will be  
5 obtained, while a physical examination and basic laboratory tests will be performed at each  
6 visit. Data collected during the follow-up visits will include ischemic symptoms, bleeding  
7 complications, and major adverse cardiac events, including re-hospitalisation and re-  
8 catheterisation. Angiographic and IVUS images will be collected at the core laboratory of  
9 Asan Medical Center and analysed offline by experts blinded to clinical data.  
10  
11  
12  
13  
14  
15  
16  
17  
18  
19  
20  
21

### 22 **Statistical analysis**

23  
24 This trial will test the hypothesis that QCA-guided PCI is non-inferior to IVUS-guided PCI  
25 concerning the primary end point of cardiac death, target-vessel myocardial infarction, or  
26 ischaemia-driven target vessel revascularisation at 12 months. Based on previous reports of  
27 real-world patients without restrictions regarding the clinical diagnosis; lesion number,  
28 severity, or location; or number of stents used,<sup>32 33</sup> we estimated that the incidence of the  
29 primary endpoint 12 months after the index procedure would be 8% in the IVUS-guided PCI  
30 group. Using a noninferiority margin of 3.5% in accordance with the noninferiority margins  
31 used in contemporary trials of DES and considering a 5% of attrition rate, we estimated that  
32 with a total of 1,528 patients, the study would provide 80% power to show noninferiority on  
33 the basis of the likelihood-score method by Farrington and Manning at a one-sided 0.025  
34 level.<sup>34,35</sup>  
35  
36  
37  
38  
39  
40  
41  
42  
43  
44  
45  
46  
47  
48

49 The analyses will be performed according to the intention-to-treat principle. A  
50 secondary per-protocol analysis will be performed to assess the effect of treatment crossovers  
51 or unanticipated problems that could dilute treatment differences of interest. Continuous  
52 variables will be presented as mean and standard deviation, while categorical variables will  
53 be shown as numbers and percentages. Intergroup differences will be evaluated by Student's  
54  
55  
56  
57  
58  
59  
60

1  
2  
3 t-test or the Wilcoxon rank sum test for continuous variables and by Pearson's  $\chi^2$  test or  
4  
5 Fisher's exact test for categorical variables as appropriate. Cumulative event rates and  
6  
7 survival curves will be generated using the Kaplan-Meier method, while intergroup  
8  
9 differences will be compared by the log-rank test. Follow-up will be censored at the date of  
10  
11 the last follow-up or at 1 year, whichever comes first. Cox's proportional hazards regression  
12  
13 analyses will be conducted to estimate the risk associated with the QCA-guided PCI strategy  
14  
15 relative to that with the IVUS-guided PCI strategy. The proportional hazards assumption  
16  
17 about the assigned treatments will be tested with the Schoenfeld residuals test. A two-sided P  
18  
19 value  $< 0.05$  will indicate significance. SAS software version 9.3 (SAS Institute, Cary, NC,  
20  
21 USA) will be used for all the statistical analyses.  
22  
23  
24  
25  
26  
27

### 28 **Trial organisation**

29  
30 The members of the executive committee include the principal investigators of the  
31  
32 investigating centres and the persons who organised this study. The committee approved the  
33  
34 final trial design and protocol issued to the Data and Safety Monitoring Board (DSMB) and  
35  
36 the clinical sites. The committee will be responsible for reviewing the final results,  
37  
38 determining the methods of presentation and publication, and selecting secondary projects  
39  
40 and publications by members of the steering committee. An independent DSMB committee,  
41  
42 headed by Sung Cheol Yun, will receive information on rates of death, myocardial infarction,  
43  
44 and major bleeding and will make recommendations based on the analyses of safety data,  
45  
46 protocol deviation, IVUS failures, and 30-day follow-up reports. The DSMB chairperson will  
47  
48 notify the data coordinating centre of any safety or compliance issues. The committee will  
49  
50 also provide confidential recommendations as necessary of study termination based on the  
51  
52 safety stopping rules determined at the study onset or when a clinically significant result is  
53  
54 identified in safety analyses of the data. This study will not be stopped early based on  
55  
56  
57  
58  
59  
60

1  
2  
3 efficacy results. The executive committee has right to the final decision to stop the study  
4  
5 prematurely based on DSMB recommendations. All DSMB reports will remain strictly  
6  
7 confidential, but will be made available to the regulatory body upon request. The centralised  
8  
9 Clinical Events Committee (CEC) is made up of interventional and non-interventional  
10  
11 cardiologists who are not participants in the study. The CEC develops specific criteria used to  
12  
13 categorise clinical events in the study that are based on the protocol. At the trial onset, the  
14  
15 CEC will establish clear rules outlining the minimum amount of data required and the  
16  
17 algorithm followed to classify a clinical event. All members of the CEC will be blinded to the  
18  
19 primary results of the trial. Data coordination and site management services will be  
20  
21 performed by the Clinical Research Center of Asan Medical Center, Seoul, Korea.  
22  
23  
24  
25  
26  
27

### 28 **Patient and public involvement**

29  
30  
31 There was no patient or public involvement in this trial.  
32  
33

### 34 **Ethical approval and dissemination**

35  
36  
37 The study protocol was approved by the internal review board of Asan Medical Center,  
38  
39 Seoul, Korea (no. 2017-0060) and each participating centre. The current protocol version is  
40  
41 3.2 date 11 March 2021. Informed consent will be obtained from every participant by study  
42  
43 personnel. The GUIDE-DES trial has been registered at ClinicalTrials.gov (study identifier  
44  
45 no. NCT02978456). The authors are solely responsible for this study's design and conduct,  
46  
47 all study analyses, manuscript drafting and editing, and final manuscript contents. The study  
48  
49 findings will be published in peer-reviewed journal articles and disseminated through public  
50  
51 forums and academic conference presentations. Cost-effectiveness and secondary imaging  
52  
53 analyses will be shared in secondary papers.  
54  
55  
56  
57  
58  
59  
60



## Current status

The anticipated duration of the study is approximately 48 months, including the enrolment period of 30 months and the follow-up period of 12 months. The first patient was enrolled on 23 February 2017, and 1,338 patients were recruited at the end of March 2021. Although patient inclusion has been delayed due to the ongoing COVID-19 outbreak, enrolment is expected to end by September 2021. The primary result of the GUIDE-DES trial will be available by late 2022 or early 2023.

## DISCUSSION

With IVUS guidance, acute stent placement can be optimised toward more significant stent expansion and fewer stent edge problems based on the reliable information about vessel size, plaque burden, suboptimal stent deployment, and procedure-related complications. To date, 10 randomised trials have compared IVUS-guided DES implantation with conventional angiographical guidance. In the IVUS group of one trial, the achievement of a minimum stent cross-sectional area greater than the distal reference lumen with IVUS guidance was associated with a 2.9% rate of 1-year major adverse cardiac events versus 5.8% ( $P = 0.007$ ) with angiography guidance.<sup>3</sup> Another large-scale trial showed that by achieving an MSA  $> 5.0 \text{ mm}^2$  and avoiding geographic miss, IVUS guidance significantly reduced the rate of target-vessel failure at 1 year.<sup>7</sup> However, despite the accumulating evidence supporting the use of IVUS to improve outcomes after PCI, its use continues to be infrequent worldwide, mostly because of the inaccessibility related to high device cost or image interpretation inexperience.<sup>36</sup> Thus, an overlooked unmet need regarding PCI is to find a way to improve outcomes of DES in a typical circumstance when IVUS is not available. An important step forward would be developing a method to overcome the drawback of conventional

1  
2  
3 angiography-guided PCI. Our study has incorporated QCA into clinical context and  
4  
5 developed a novel size selection algorithm based on the QCA measurement, which  
6  
7 standardizes the angiography-based PCI procedure to select an appropriately sized stent or  
8  
9 balloon without significant intra- or interindividual variability.  
10  
11

12  
13 Previous randomised trials did not provide an objective guide or definition for stent  
14  
15 optimisation for the angiography-guided group. Using visual assessment, interventionists  
16  
17 tend to choose undersized stents and perform less aggressive post-dilation, leading to  
18  
19 suboptimal immediate results and an increased risk of target-lesion failure.<sup>37</sup> QCA has been  
20  
21 used to provide quantitative measures of angiography, mostly in clinical studies. The  
22  
23 advantage of QCA over visual estimation is that its measurements are objective and relatively  
24  
25 reproducible. Furthermore, QCA is easy to use without co-registration or additional cost and  
26  
27 is available at every catheterisation laboratory. Unfortunately, it is not commonly used to  
28  
29 guide PCI in real-world practice. This trial will test the utility of real-time QCA guidance for  
30  
31 PCI with a goal of incorporating core laboratory experiences into daily clinical practice.  
32  
33

34  
35 In the PROSPECT substudy, there was a strong correlation between minimal lumen  
36  
37 diameters on QCA and IVUS, with underestimation in relatively small arteries (<3.8 mm)  
38  
39 and overestimation in larger arteries (>3.8 mm) with an excellent correlation ( $r = 0.89$ ,  $p <$   
40  
41  $0.001$ ).<sup>23</sup> Optical coherence tomography (OCT) accurately measures lumen diameters  
42  
43 because it produces high-resolution images that are identical to the actual values. The OPUS-  
44  
45 CLASS study showed that QCA underestimates lumen diameters by 5% compared with  
46  
47 OCT, whereas IVUS overestimates lumen diameters by 8% compared with OCT.<sup>18</sup> Therefore  
48  
49 in the present study, we planned to differentially adjust the measured QCA values by 5–10%  
50  
51 to estimate the reference segment's lumen diameter. Inadequate filling of the vessels with  
52  
53 contrast media and coronary artery spasms lead to underestimation of the accurate lumen  
54  
55 dimensions. Thus, taking images of vessels filled with contrast medium after nitroglycerin  
56  
57  
58  
59  
60

1  
2  
3 injection is recommended to overcome measurement errors. QCA should be repeated if the  
4 coronary lumen dimension increases after pre-dilation of severely stenotic lesions. The  
5 American College of Cardiology/American Heart Association guideline recommends a  
6 minimum residual percent diameter stenosis of <10% by visual estimation after stent  
7 implantation, and this criterion as stent optimisation was adopted in the QCA-guided arm in  
8 our study. The concept of “the bigger, the better” remains valid in the DES era.  
9 Contemporary thin-strut DES may have weaker radial strength and greater recoil with a  
10 smaller lumen area, requiring the need for high-pressure post-dilation to achieve optimal PCI  
11 results.<sup>37</sup> Stent boost subtract imaging allows clear visualisation of the stents and reliable  
12 detection of stent underexpansion.<sup>38</sup> Routine high-pressure post-dilation, preferably guided  
13 by stent boost subtract imaging, will likely lead to minimal residual diameter stenosis with a  
14 low risk of edge problems.<sup>22,39</sup> The GUIDE-DES trial will explore whether incorporating  
15 these angiography-based technical considerations into a standardised PCI algorithm may be  
16 an acceptable alternative to IVUS-guided PCI in terms of device-oriented PCI outcomes.

17  
18  
19  
20  
21  
22  
23  
24  
25  
26  
27  
28  
29  
30  
31  
32  
33  
34  
35  
36  
37  
38  
39  
40  
41  
42  
43  
44  
45  
46  
47  
48  
49  
50  
51  
52  
53  
54  
55  
56  
57  
58  
59  
60  
The success of using QCA for real-time PCI guidance may have significant future implications along with the development of artificial intelligence technologies. A robust deep learning model has already been proposed to automatically segment the major vessels on coronary angiography.<sup>40</sup> With this technique, the image processing time can be minimised with less manual correction, allowing immediate QCA analysis on the operator screen in the catheterisation room. Thus, diagnosis with 3-D QCA could be utilised for PCI by combining the 2-D QCA of multiple angiograms.<sup>41</sup> Further investigations of IVUS-based machine learning algorithms may lead to outcomes similar to those with IVUS guidance after QCA-guided PCI.

1  
2  
3 **Acknowledgments:** We thank all members of this trial group for their ideas, suggestions,  
4 participation, and general assistance. This paper was edited for language by Editage  
5 (www.editage.co.kr).  
6  
7  
8  
9

10 **Author Contributions:** PHL, SWL, and CWL developed the trial concept and wrote the  
11 protocol and the manuscript of the protocol publication. SJH, HSK, YWY, JYL, SJO, SJK,  
12 YHK, and SWP helped to develop the trial concept and revised the manuscript critically for  
13 important intellectual content.  
14  
15  
16  
17  
18

19 **Sources of Funding:** This study is funded by an unrestricted grant from Biotronik, Bülach,  
20 Switzerland (G1709).  
21  
22  
23

24 **Conflict of interest:** None  
25  
26  
27  
28  
29  
30  
31  
32  
33  
34  
35  
36  
37  
38  
39  
40  
41  
42  
43  
44  
45  
46  
47  
48  
49  
50  
51  
52  
53  
54  
55  
56  
57  
58  
59  
60

## REFERENCES

1. Hibi K, Kimura K, Umemura S. Clinical utility and significance of intravascular ultrasound and optical coherence tomography in guiding percutaneous coronary interventions. *Circ J* 2015;79:24-33.
2. Chieffo A, Latib A, Caussin C, et al. A prospective, randomized trial of intravascular-ultrasound guided compared to angiography guided stent implantation in complex coronary lesions: the AVIO trial. *Am Heart J* 2013;165:65-72.
3. Hong SJ, Kim BK, Shin DH, et al. Effect of Intravascular Ultrasound-Guided vs Angiography-Guided Everolimus-Eluting Stent Implantation: The IVUS-XPL Randomized Clinical Trial. *JAMA* 2015;314:2155-63.
4. Tian NL, Gami SK, Ye F, et al. Angiographic and clinical comparisons of intravascular ultrasound- versus angiography-guided drug-eluting stent implantation for patients with chronic total occlusion lesions: two-year results from a randomised AIR-CTO study. *EuroIntervention* 2015;10:1409-17.
5. Tan Q, Wang Q, Liu D, et al. Intravascular ultrasound-guided unprotected left main coronary artery stenting in the elderly. *Saudi Med J* 2015;36:549-53.
6. Mariani J, Jr., Guedes C, Soares P, et al. Intravascular ultrasound guidance to minimize the use of iodine contrast in percutaneous coronary intervention: the MOZART (Minimizing cOntrast utiliZation With IVUS Guidance in coRonary angioplasTy) randomized controlled trial. *JACC Cardiovasc Interv* 2014;7:1287-93.
7. Zhang J, Gao X, Kan J, et al. Intravascular Ultrasound Versus Angiography-Guided Drug-Eluting Stent Implantation: The ULTIMATE Trial. *J Am Coll Cardiol* 2018;72:3126-37.

- 1  
2  
3 8. Jakabcin J, Spacek R, Bystron M, et al. Long-term health outcome and mortality  
4 evaluation after invasive coronary treatment using drug eluting stents with or without  
5 the IVUS guidance. Randomized control trial. HOME DES IVUS. *Catheter*  
6 *Cardiovasc Interv* 2010;75:578-83.  
7  
8  
9
- 10  
11  
12 9. Kim JS, Kang TS, Mintz GS, et al. Randomized comparison of clinical outcomes  
13 between intravascular ultrasound and angiography-guided drug-eluting stent  
14 implantation for long coronary artery stenoses. *JACC Cardiovasc Interv* 2013;6:369-  
15 76.  
16  
17  
18  
19  
20
- 21  
22 10. Kim BK, Shin DH, Hong MK, et al. Clinical Impact of Intravascular Ultrasound-  
23 Guided Chronic Total Occlusion Intervention With Zotarolimus-Eluting Versus  
24 Biolimus-Eluting Stent Implantation: Randomized Study. *Circ Cardiovasc Interv*  
25 2015;8:e002592.  
26  
27  
28  
29
- 30  
31 11. Steinvil A, Zhang YJ, Lee SY, et al. Intravascular ultrasound-guided drug-eluting  
32 stent implantation: An updated meta-analysis of randomized control trials and  
33 observational studies. *Int J Cardiol* 2016;216:133-9.  
34  
35  
36  
37
- 38 12. Elgendy IY, Mahmoud AN, Elgendy AY, et al. Outcomes With Intravascular  
39 Ultrasound-Guided Stent Implantation: A Meta-Analysis of Randomized Trials in the  
40 Era of Drug-Eluting Stents. *Circ Cardiovasc Interv* 2016;9:e003700.  
41  
42  
43  
44
- 45 13. Shin DH, Hong SJ, Mintz GS, et al. Effects of Intravascular Ultrasound-Guided  
46 Versus Angiography-Guided New-Generation Drug-Eluting Stent Implantation:  
47 Meta-Analysis With Individual Patient-Level Data From 2,345 Randomized Patients.  
48 *JACC Cardiovasc Interv* 2016;9:2232-9.  
49  
50  
51  
52  
53
- 54 14. Bavishi C, Sardar P, Chatterjee S, et al. Intravascular ultrasound-guided vs  
55 angiography-guided drug-eluting stent implantation in complex coronary lesions:  
56 Meta-analysis of randomized trials. *Am Heart J* 2017;185:26-34.  
57  
58  
59  
60

- 1  
2  
3 15. Campbell PT, Mahmud E, Marshall JJ. Interoperator and intraoperator (in)accuracy of  
4 stent selection based on visual estimation. *Catheter Cardiovasc Interv* 2015;86:1177-  
5  
6 83.  
7  
8  
9
- 10 16. Smilowitz NR, Mohananey D, Razzouk L, et al. Impact and trends of intravascular  
11 imaging in diagnostic coronary angiography and percutaneous coronary intervention  
12 in inpatients in the United States. *Catheter Cardiovasc Interv* 2018;92:E410-E5.  
13  
14
- 15 17. Mintz GS, Guagliumi G. Intravascular imaging in coronary artery disease. *Lancet*  
16 2017;390:793-809.  
17  
18
- 19 18. Kubo T, Akasaka T, Shite J, et al. OCT compared with IVUS in a coronary lesion  
20 assessment: the OPUS-CLASS study. *JACC Cardiovasc Imaging* 2013;6:1095-104.  
21  
22
- 23 19. Sotomi Y, Onuma Y, Suwannasom P, et al. Is quantitative coronary angiography  
24 reliable in assessing the lumen gain after treatment with the everolimus-eluting  
25 bioresorbable polylactide scaffold? *EuroIntervention* 2016;12:e998-e1008.  
26  
27
- 28 20. Mercado N, Boersma E, Wijns W, et al. Clinical and quantitative coronary  
29 angiographic predictors of coronary restenosis: a comparative analysis from the  
30 balloon-to-stent era. *J Am Coll Cardiol* 2001;38:645-52.  
31  
32
- 33 21. Cassese S, Byrne RA, Tada T, et al. Incidence and predictors of restenosis after  
34 coronary stenting in 10 004 patients with surveillance angiography. *Heart*  
35 2014;100:153-9.  
36  
37
- 38 22. Romagnoli E, Sangiorgi GM, Cosgrave J, et al. Drug-eluting stenting: the case for  
39 post-dilation. *JACC Cardiovasc Interv* 2008;1:22-31.  
40  
41
- 42 23. Goto K, Mintz GS, Litherland C, et al. Lumen Measurements From Quantitative  
43 Coronary Angiography and IVUS: A PROSPECT Substudy. *JACC Cardiovasc*  
44 *Imaging* 2016;9:1011-3.  
45  
46  
47  
48  
49  
50  
51  
52  
53  
54  
55  
56  
57  
58  
59  
60

- 1  
2  
3 24. Finet G, Gilard M, Perrenot B, et al. Fractal geometry of arterial coronary  
4 bifurcations: a quantitative coronary angiography and intravascular ultrasound  
5 analysis. *EuroIntervention* 2008;3:490-8.  
6  
7  
8  
9  
10 25. Levine GN, Bates ER, Blankenship JC, et al. 2011 ACCF/AHA/SCAI Guideline for  
11 Percutaneous Coronary Intervention. A report of the American College of Cardiology  
12 Foundation/American Heart Association Task Force on Practice Guidelines and the  
13 Society for Cardiovascular Angiography and Interventions. *J Am Coll Cardiol*  
14 2011;58:e44-122.  
15  
16  
17  
18  
19  
20  
21 26. Choi SY, Witzendichler B, Maehara A, et al. Intravascular ultrasound findings of  
22 early stent thrombosis after primary percutaneous intervention in acute myocardial  
23 infarction: a Harmonizing Outcomes with Revascularization and Stents in Acute  
24 Myocardial Infarction (HORIZONS-AMI) substudy. *Circ Cardiovasc Interv*  
25 2011;4:239-47.  
26  
27  
28  
29  
30  
31  
32  
33 27. Cheneau E, Leborgne L, Mintz GS, et al. Predictors of subacute stent thrombosis:  
34 results of a systematic intravascular ultrasound study. *Circulation* 2003;108:43-7.  
35  
36  
37  
38 28. Amsterdam EA, Wenger NK, Brindis RG, et al. 2014 AHA/ACC guideline for the  
39 management of patients with non-ST-elevation acute coronary syndromes: a report of  
40 the American College of Cardiology/American Heart Association Task Force on  
41 Practice Guidelines. *Circulation* 2014;130:e344-426.  
42  
43  
44  
45  
46  
47 29. Fihn SD, Gardin JM, Abrams J, et al. 2012  
48 ACCF/AHA/ACP/AATS/PCNA/SCAI/STS guideline for the diagnosis and  
49 management of patients with stable ischemic heart disease: executive summary: a  
50 report of the American College of Cardiology Foundation/American Heart  
51 Association task force on practice guidelines, and the American College of  
52 Physicians, American Association for Thoracic Surgery, Preventive Cardiovascular  
53  
54  
55  
56  
57  
58  
59  
60



- 1  
2  
3 Nurses Association, Society for Cardiovascular Angiography and Interventions, and  
4 Society of Thoracic Surgeons. *Circulation* 2012;126:3097-137.  
5  
6  
7  
8 30. Moussa ID, Klein LW, Shah B, et al. Consideration of a new definition of clinically  
9 relevant myocardial infarction after coronary revascularization: an expert consensus  
10 document from the Society for Cardiovascular Angiography and Interventions  
11  
12  
13  
14 (SCAI). *Catheter Cardiovasc Interv* 2014;83:27-36.  
15  
16  
17 31. Thygesen K, Alpert JS, Jaffe AS, et al. Third universal definition of myocardial  
18 infarction. *Circulation* 2012;126:2020-35.  
19  
20  
21 32. Silber S, Windecker S, Vranckx P, et al. Unrestricted randomised use of two new  
22 generation drug-eluting coronary stents: 2-year patient-related versus stent-related  
23 outcomes from the RESOLUTE All Comers trial. *Lancet* 2011;377:1241-7.  
24  
25  
26  
27 33. Park DW, Kim YH, Song HG, et al. Outcomes after unrestricted use of everolimus-  
28 eluting and sirolimus-eluting stents in routine clinical practice: a multicenter,  
29 prospective cohort study. *Circ Cardiovasc Interv* 2012;5:365-71.  
30  
31  
32  
33 34. Farrington CP, Manning G. Test statistics and sample size formulae for comparative  
34 binomial trials with null hypothesis of non-zero risk difference or non-unity relative  
35 risk. *Stat Med* 1990;9:1447-54.  
36  
37  
38  
39 35. Ellis SG, Kereiakes DJ, Metzger DC, et al. Everolimus-Eluting Bioresorbable  
40 Scaffolds for Coronary Artery Disease. *N Engl J Med* 2015;373:1905-15.  
41  
42  
43  
44 36. Elgendy IY, Ha LD, Elbadawi A, et al. Temporal Trends in Inpatient Use of  
45 Intravascular Imaging Among Patients Undergoing Percutaneous Coronary  
46 Intervention in the United States. *JACC Cardiovasc Interv* 2018;11:913-5.  
47  
48  
49  
50 37. de Ribamar Costa J, Jr., Mintz GS, Carlier SG, et al. Intravascular ultrasound  
51 assessment of drug-eluting stent expansion. *Am Heart J* 2007;153:297-303.  
52  
53  
54  
55  
56  
57  
58  
59  
60

- 1  
2  
3 38. Mishell JM, Vakharia KT, Ports TA, et al. Determination of adequate coronary stent  
4 expansion using StentBoost, a novel fluoroscopic image processing technique.  
5  
6 *Catheter Cardiovasc Interv* 2007;69:84-93.  
7  
8  
9  
10 39. Brodie BR, Cooper C, Jones M, et al. Is adjunctive balloon postdilatation necessary  
11 after coronary stent deployment? Final results from the POSTIT trial. *Catheter*  
12 *Cardiovasc Interv* 2003;59:184-92.  
13  
14  
15  
16  
17 40. Yang S, Kweon J, Roh JH, et al. Deep learning segmentation of major vessels in X-  
18 ray coronary angiography. *Sci Rep* 2019;9:16897.  
19  
20  
21  
22 41. Tu S, Xu L, Ligthart J, et al. In vivo comparison of arterial lumen dimensions  
23 assessed by co-registered three-dimensional (3D) quantitative coronary angiography,  
24 intravascular ultrasound and optical coherence tomography. *Int J Cardiovasc Imaging*  
25 2012;28:1315-27.  
26  
27  
28  
29  
30  
31  
32  
33  
34  
35  
36  
37  
38  
39  
40  
41  
42  
43  
44  
45  
46  
47  
48  
49  
50  
51  
52  
53  
54  
55  
56  
57  
58  
59  
60

**FIGURE LEGENDS****Figure 1.** Study flow chart

BVS, bioresorbable vascular scaffold; CAD, coronary artery disease; DES, drug-eluting stent; ID-TLR, ischaemia-driven target-lesion revascularisation; IVUS, intravascular ultrasound; LVEF, left ventricular ejection fraction; MI, myocardial infarction; PCI, percutaneous coronary intervention; QCA, quantitative coronary angiography

\*Sirolimus-eluting Orsiro or Orsiro Mission stents were used in this trial.

**Figure 2.** Outline of the QCA-guided PCI strategy

PCI, percutaneous coronary intervention; QCA, quantitative coronary angiography



Study flow chart

**Design by angiogram**

- obtain the best angiographic images adequately filled with contrast media
- identify the landing zones (normal or normal-looking area)

**Sizing by QCA**

- measure the lumen diameter at the reference segments by QCA
- calculate the adjusted QCA diameter (target diameter)  
= measured QCA value + 5~10% of the measured QCA value

**Finish by post-dilation**

- Stent selection & deployment: choose the stent size to reach the target diameter of the distal reference segment and inflate the stent balloon up to the target diameter
- Stent optimization at its edge and within the stent: high-pressure post-dilation to achieve minimal residual stenosis (diameter stenosis < 10%) assessed by stent boost imaging

Outline of the QCA-guided PCI strategy

## Supplemental Material Online

This Supplementary data has been provided by the authors to give readers additional information about their work.

**Supplemental Table 1.** Adjusted QCA values (target diameters) of the reference segments derived from the QCA measurements

**Supplemental Figure 1.** Representative case of QCA-guided PCI

**Supplemental Figure 2.** Estimation of the main branch size without normal-looking area

**Supplemental Figure 3.** Stent edge optimization

**Supplemental Table 1.** Adjusted QCA values (target diameters) of the reference segments derived from the QCA measurements

| Measured value      | Target diameter | Measured value      | Target diameter |
|---------------------|-----------------|---------------------|-----------------|
| $\leq 3.5\text{mm}$ | + 10%           | 3.6–3.9mm           | + 6~9%          |
| 2.0                 | 2.2             | 3.6                 | 3.92            |
| 2.1                 | 2.31            | 3.7                 | 4.0             |
| 2.2                 | 2.42            | 3.8                 | 4.07            |
| 2.3                 | 2.53            | 3.9                 | 4.13            |
| 2.4                 | 2.64            | $\geq 4.0\text{mm}$ | + 5%            |
| 2.5                 | 2.75            | 4.0                 | 4.2             |
| 2.6                 | 2.86            | 4.1                 | 4.31            |
| 2.7                 | 2.97            | 4.2                 | 4.41            |
| 2.8                 | 3.08            | 4.3                 | 4.52            |
| 2.9                 | 3.19            | 4.4                 | 4.62            |
| 3.0                 | 3.3             | 4.5                 | 4.73            |
| 3.1                 | 3.41            | 4.6                 | 4.83            |
| 3.2                 | 3.52            | 4.7                 | 4.94            |
| 3.3                 | 3.63            | 4.8                 | 5.04            |
| 3.4                 | 3.74            | 4.9                 | 5.15            |
| 3.5                 | 3.85            | 5.0                 | 5.25            |

Supplemental Figure 1. Representative case of QCA-guided PCI

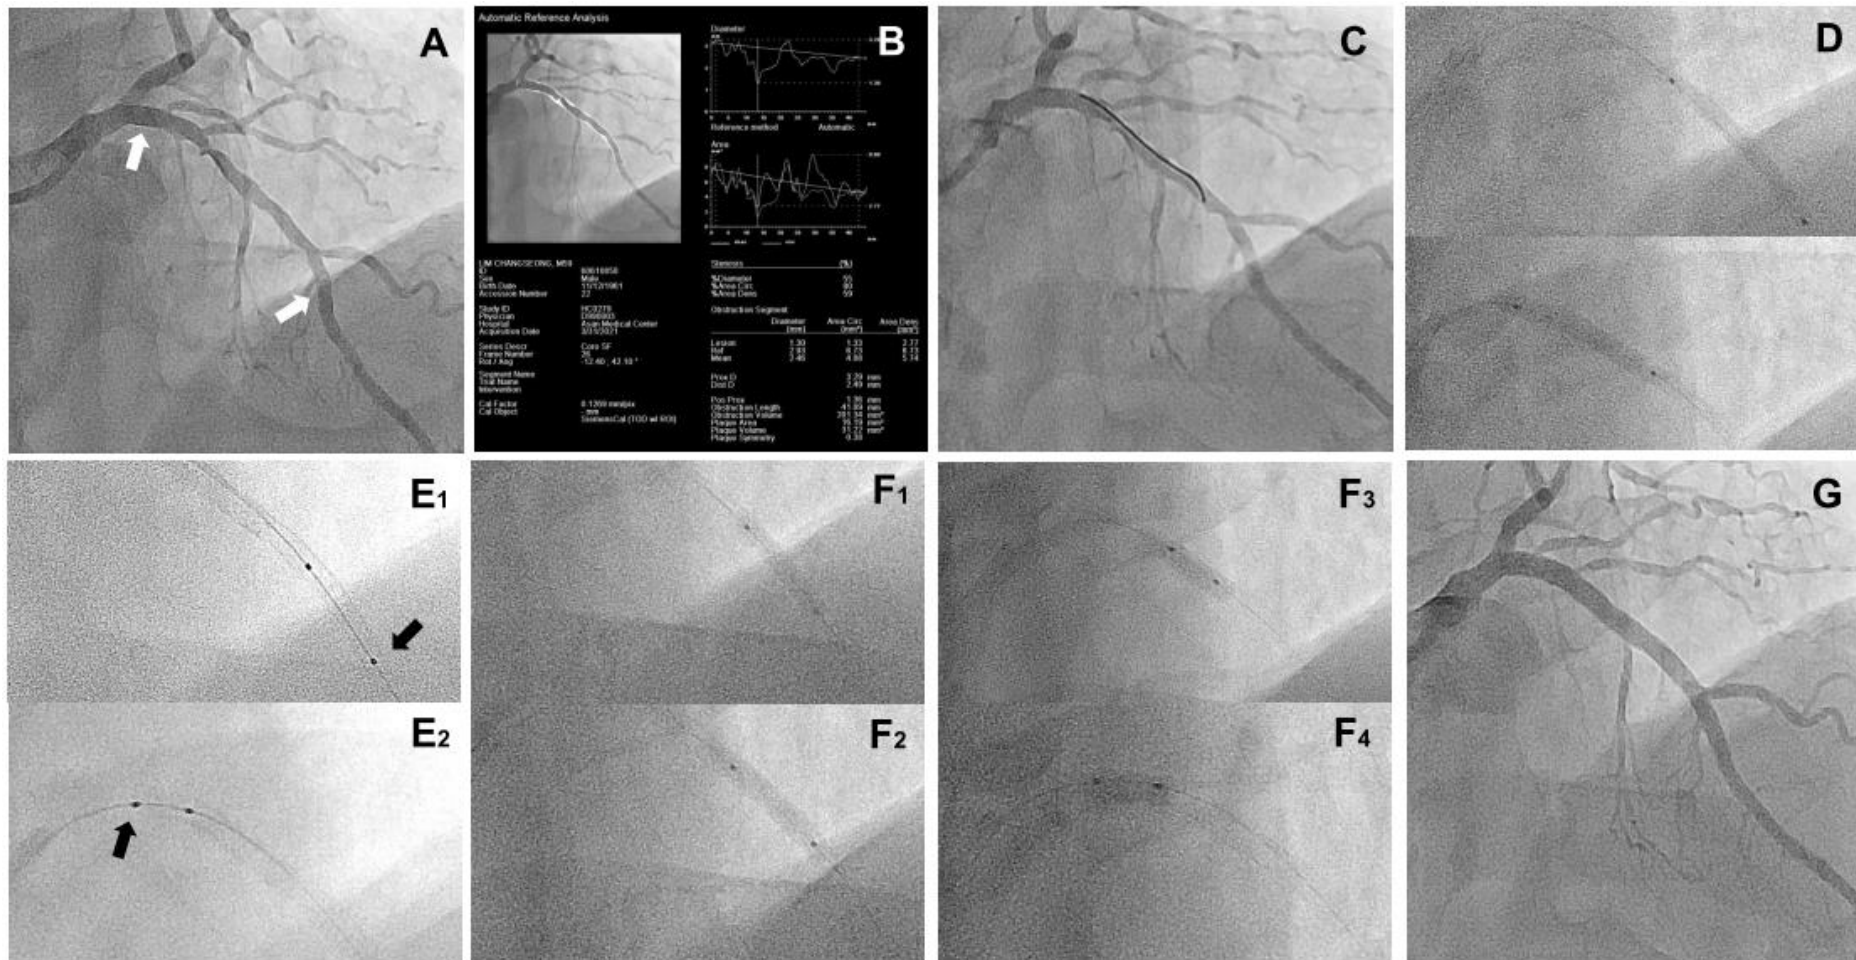

A) Baseline angiogram and identification of the distal and proximal reference segments (arrows), B) QCA measurement of reference diameters (distal reference 2.49mm, proximal reference 3.29mm) and calculation of the adjusted QCA sizes (target diameters: distal reference 2.74mm, proximal reference 3.62mm), C) Estimation of lesion length using 30mm radiopaque tip of the guidewire (about 49mm), D) Stent selection (Orsiro Mission 2.5×26mm stent, Orsiro Mission



1  
2  
3 3.0×26mm stent) and delivery, followed by balloon inflation up to target diameter of the distal reference segment (distal stent, ballooning up to 2.76mm at 15atm;  
4 proximal stent, ballooning up to 3.34mm at 16atm), E) Positioning the radiopaque marker of noncompliant balloons over stent edges guided by stent boost imaging  
5 (arrows: E1, distal stent edge; E2, proximal stent edge), F) Multiple high-pressure balloon dilation using NC balloons to achieve minimal residual stenosis guided by  
6 stent boost imaging: distal stent edge (F1: FORCE™ NC [2.75×15mm], ballooning up to 2.75mm at 12atm), in-stent (F2: FORCE™ NC [2.75×15mm], ballooning  
7 up to 3.11mm at 26atm; F3: NEON™ NC [3.5×10 mm], ballooning up to 3.44mm at 10atm), and proximal stent edge (F4: NEON™ NC [3.5×10 mm], ballooning up  
8 to 3.65mm at 18atm), G) Final angiogram with minimal residual stenosis and smooth transition between the stent edges and the reference segments. Atm,  
9 atmosphere; NC, noncompliant; PCI, percutaneous coronary intervention; QCA, quantitative coronary angiography.  
10  
11  
12  
13  
14  
15  
16  
17  
18  
19  
20  
21  
22  
23  
24  
25  
26  
27  
28  
29  
30  
31  
32  
33  
34  
35  
36  
37  
38  
39  
40  
41  
42  
43  
44  
45  
46

**Supplemental Figure 2.** Estimation of the main branch size without normal-looking area

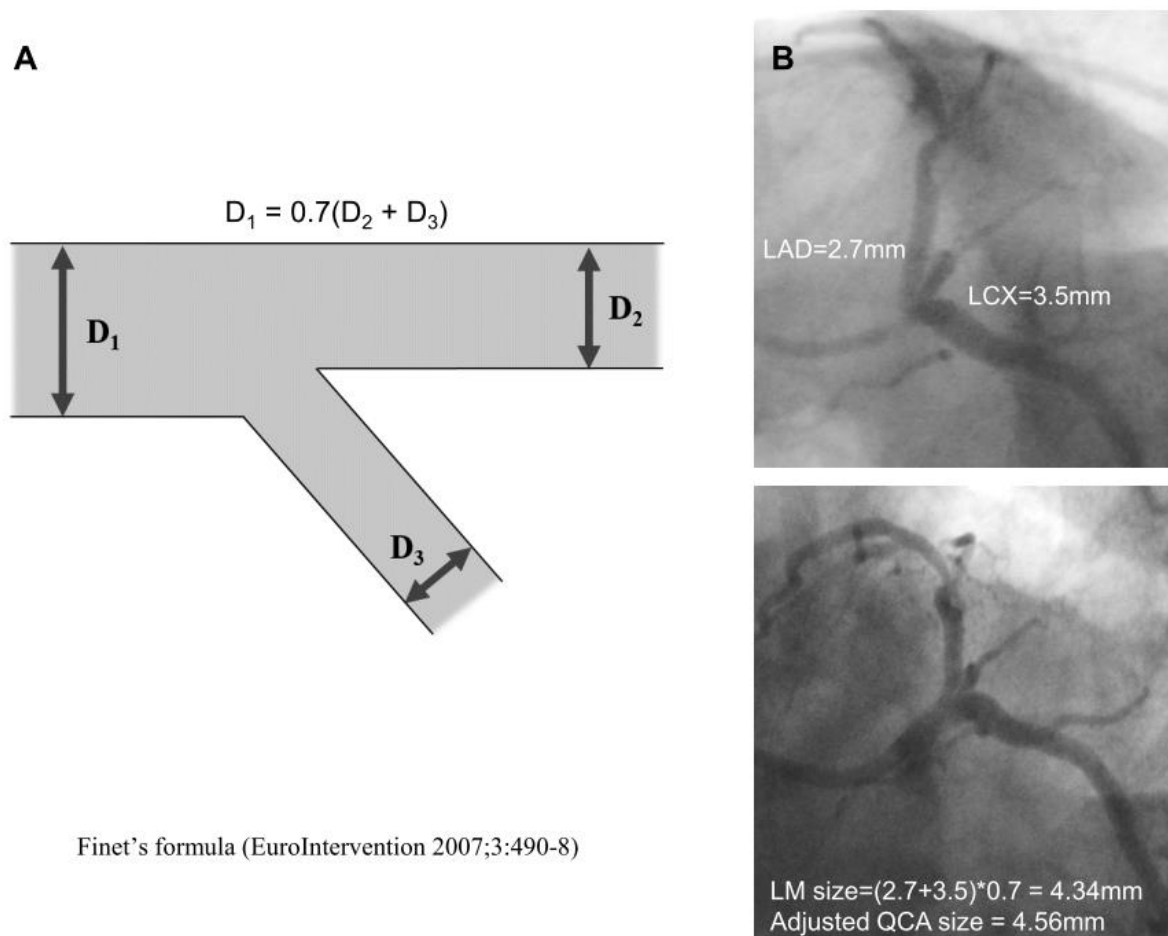

A) If there is no reference zone of the main branch at a bifurcation site, its size is estimated by Finet's formula. B) Angiograms estimating diameter of the LM coronary artery without normal-looking area: distal LM diameter = (diameter of the proximal LAD + diameter of the proximal LCX)  $\times$  0.7. Right upper panel, LM coronary artery stenosis without normal-looking area. Right lower panel, angiogram after LM coronary artery stenting based on the adjusted QCA size.

D, diameter; LAD, left anterior descending coronary artery; LCX, left circumflex coronary artery; LM, left main; QCA, quantitative coronary angiography.

1  
2  
3 **Supplemental Figure 3.** Positioning the radiopaque marker of noncompliant balloon over  
4 stent edge for optimization of the stent edges  
5  
6

7 **A**

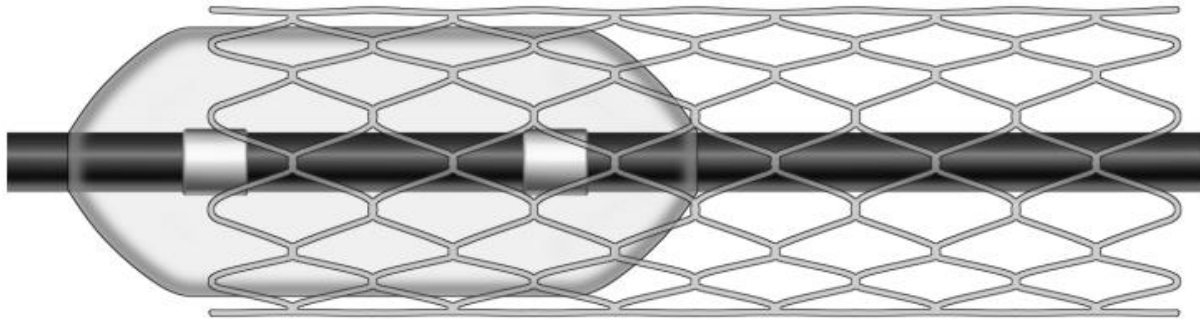

19  
20  
21 **B**

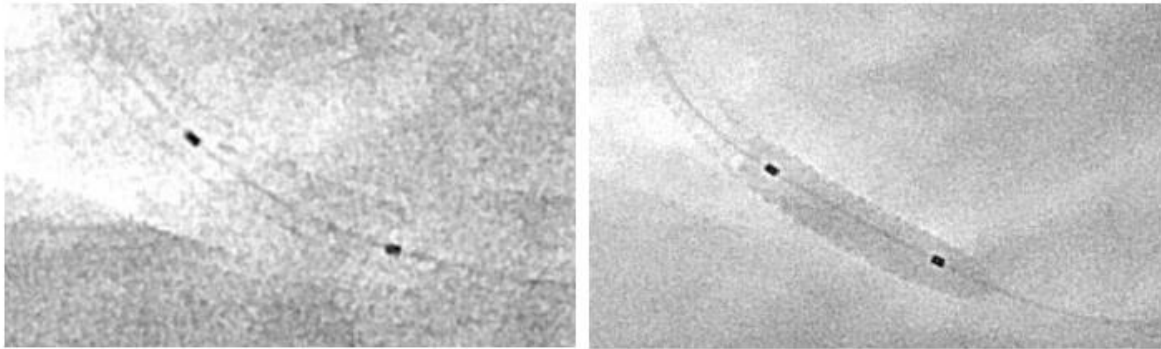

34  
35 A) Schematic illustration, B) Stent boost image. Post-dilations of the proximal and distal stent  
36 edges are separately performed up to each target diameters using high-pressure noncompliant  
37 balloons.  
38  
39

# Reporting checklist for protocol of a clinical trial.

Based on the SPIRIT guidelines.

## Instructions to authors

Complete this checklist by entering the page numbers from your manuscript where readers will find each of the items listed below.

Your article may not currently address all the items on the checklist. Please modify your text to include the missing information. If you are certain that an item does not apply, please write "n/a" and provide a short explanation.

Upload your completed checklist as an extra file when you submit to a journal.

In your methods section, say that you used the SPIRIT reporting guidelines, and cite them as:

Chan A-W, Tetzlaff JM, Gøtzsche PC, Altman DG, Mann H, Berlin J, Dickersin K, Hróbjartsson A, Schulz KF, Parulekar WR, Krleža-Jerić K, Laupacis A, Moher D. SPIRIT 2013 Explanation and Elaboration: Guidance for protocols of clinical trials. *BMJ*. 2013;346:e7586

|                                   |                                                                                                                                 | Page Number |
|-----------------------------------|---------------------------------------------------------------------------------------------------------------------------------|-------------|
| <b>Administrative information</b> |                                                                                                                                 |             |
| Title                             | <a href="#">#1</a> Descriptive title identifying the study design, population, interventions, and, if applicable, trial acronym | 1           |

|    |                     |                     |                                                            |      |
|----|---------------------|---------------------|------------------------------------------------------------|------|
| 1  | Trial registration  | <a href="#">#2a</a> | Trial identifier and registry name. If not yet registered, | 2    |
| 2  |                     |                     | name of intended registry                                  |      |
| 3  |                     |                     |                                                            |      |
| 4  |                     |                     |                                                            |      |
| 5  |                     |                     |                                                            |      |
| 6  | Trial registration: | <a href="#">#2b</a> | All items from the World Health Organization Trial         | 2    |
| 7  |                     |                     |                                                            |      |
| 8  | data set            |                     | Registration Data Set                                      |      |
| 9  |                     |                     |                                                            |      |
| 10 |                     |                     |                                                            |      |
| 11 |                     |                     |                                                            |      |
| 12 | Protocol version    | <a href="#">#3</a>  | Date and version identifier                                | 16   |
| 13 |                     |                     |                                                            |      |
| 14 |                     |                     |                                                            |      |
| 15 | Funding             | <a href="#">#4</a>  | Sources and types of financial, material, and other        | 20   |
| 16 |                     |                     | support                                                    |      |
| 17 |                     |                     |                                                            |      |
| 18 |                     |                     |                                                            |      |
| 19 |                     |                     |                                                            |      |
| 20 | Roles and           | <a href="#">#5a</a> | Names, affiliations, and roles of protocol contributors    | 1,20 |
| 21 |                     |                     |                                                            |      |
| 22 | responsibilities:   |                     |                                                            |      |
| 23 |                     |                     |                                                            |      |
| 24 | contributorship     |                     |                                                            |      |
| 25 |                     |                     |                                                            |      |
| 26 |                     |                     |                                                            |      |
| 27 |                     |                     |                                                            |      |
| 28 | Roles and           | <a href="#">#5b</a> | Name and contact information for the trial sponsor         | 5    |
| 29 |                     |                     |                                                            |      |
| 30 | responsibilities:   |                     |                                                            |      |
| 31 |                     |                     |                                                            |      |
| 32 | sponsor contact     |                     |                                                            |      |
| 33 |                     |                     |                                                            |      |
| 34 | information         |                     |                                                            |      |
| 35 |                     |                     |                                                            |      |
| 36 |                     |                     |                                                            |      |
| 37 |                     |                     |                                                            |      |
| 38 | Roles and           | <a href="#">#5c</a> | Role of study sponsor and funders, if any, in study        | 5    |
| 39 |                     |                     | design; collection, management, analysis, and              |      |
| 40 | responsibilities:   |                     | interpretation of data; writing of the report; and the     |      |
| 41 |                     |                     | decision to submit the report for publication, including   |      |
| 42 | sponsor and funder  |                     | whether they will have ultimate authority over any of      |      |
| 43 |                     |                     | these activities                                           |      |
| 44 |                     |                     |                                                            |      |
| 45 |                     |                     |                                                            |      |
| 46 |                     |                     |                                                            |      |
| 47 |                     |                     |                                                            |      |
| 48 |                     |                     |                                                            |      |
| 49 |                     |                     |                                                            |      |
| 50 |                     |                     |                                                            |      |
| 51 |                     |                     |                                                            |      |
| 52 | Roles and           | <a href="#">#5d</a> | Composition, roles, and responsibilities of the            | 15   |
| 53 |                     |                     | coordinating centre, steering committee, endpoint          |      |
| 54 | responsibilities:   |                     | adjudication committee, data management team, and          |      |
| 55 |                     |                     |                                                            |      |
| 56 | committees          |                     |                                                            |      |
| 57 |                     |                     |                                                            |      |
| 58 |                     |                     |                                                            |      |
| 59 |                     |                     |                                                            |      |
| 60 |                     |                     |                                                            |      |

other individuals or groups overseeing the trial, if applicable (see Item 21a for data monitoring committee)

## Introduction

|                                                  |                     |                                                                                                                                                                                                            |    |
|--------------------------------------------------|---------------------|------------------------------------------------------------------------------------------------------------------------------------------------------------------------------------------------------------|----|
| Background and rationale                         | <a href="#">#6a</a> | Description of research question and justification for undertaking the trial, including summary of relevant studies (published and unpublished) examining benefits and harms for each intervention         | 4  |
| Background and rationale: choice of comparators  | <a href="#">#6b</a> | Explanation for choice of comparators                                                                                                                                                                      | 5  |
| Objectives                                       | <a href="#">#7</a>  | Specific objectives or hypotheses                                                                                                                                                                          | 14 |
| Trial design                                     | <a href="#">#8</a>  | Description of trial design including type of trial (eg, parallel group, crossover, factorial, single group), allocation ratio, and framework (eg, superiority, equivalence, non-inferiority, exploratory) | 5  |
| <b>Methods:</b>                                  |                     |                                                                                                                                                                                                            |    |
| <b>Participants, interventions, and outcomes</b> |                     |                                                                                                                                                                                                            |    |
| Study setting                                    | <a href="#">#9</a>  | Description of study settings (eg, community clinic, academic hospital) and list of countries where data will be collected. Reference to where list of study sites can be obtained                         | 9  |

|    |                      |                      |                                                              |       |
|----|----------------------|----------------------|--------------------------------------------------------------|-------|
| 1  | Eligibility criteria | <a href="#">#10</a>  | Inclusion and exclusion criteria for participants. If        | 6-7   |
| 2  |                      |                      |                                                              |       |
| 3  |                      |                      | applicable, eligibility criteria for study centres and       |       |
| 4  |                      |                      | individuals who will perform the interventions (eg,          |       |
| 5  |                      |                      | surgeons, psychotherapists)                                  |       |
| 6  |                      |                      |                                                              |       |
| 7  |                      |                      |                                                              |       |
| 8  |                      |                      |                                                              |       |
| 9  |                      |                      |                                                              |       |
| 10 |                      |                      |                                                              |       |
| 11 | Interventions:       | <a href="#">#11a</a> | Interventions for each group with sufficient detail to allow | 9-10  |
| 12 |                      |                      |                                                              |       |
| 13 | description          |                      | replication, including how and when they will be             |       |
| 14 |                      |                      | administered                                                 |       |
| 15 |                      |                      |                                                              |       |
| 16 |                      |                      |                                                              |       |
| 17 |                      |                      |                                                              |       |
| 18 |                      |                      |                                                              |       |
| 19 | Interventions:       | <a href="#">#11b</a> | Criteria for discontinuing or modifying allocated            | 11    |
| 20 |                      |                      |                                                              |       |
| 21 | modifications        |                      | interventions for a given trial participant (eg, drug dose   |       |
| 22 |                      |                      | change in response to harms, participant request, or         |       |
| 23 |                      |                      | improving / worsening disease)                               |       |
| 24 |                      |                      |                                                              |       |
| 25 |                      |                      |                                                              |       |
| 26 |                      |                      |                                                              |       |
| 27 |                      |                      |                                                              |       |
| 28 |                      |                      |                                                              |       |
| 29 | Interventions:       | <a href="#">#11c</a> | Strategies to improve adherence to intervention protocols,   | 9-11  |
| 30 |                      |                      |                                                              |       |
| 31 | adherence            |                      | and any procedures for monitoring adherence (eg, drug        |       |
| 32 |                      |                      | tablet return; laboratory tests)                             |       |
| 33 |                      |                      |                                                              |       |
| 34 |                      |                      |                                                              |       |
| 35 |                      |                      |                                                              |       |
| 36 | Interventions:       | <a href="#">#11d</a> | Relevant concomitant care and interventions that are         | 11-12 |
| 37 |                      |                      |                                                              |       |
| 38 | concomitant care     |                      | permitted or prohibited during the trial                     |       |
| 39 |                      |                      |                                                              |       |
| 40 |                      |                      |                                                              |       |
| 41 |                      |                      |                                                              |       |
| 42 | Outcomes             | <a href="#">#12</a>  | Primary, secondary, and other outcomes, including the        | 12-13 |
| 43 |                      |                      | specific measurement variable (eg, systolic blood            |       |
| 44 |                      |                      | pressure), analysis metric (eg, change from baseline, final  |       |
| 45 |                      |                      | value, time to event), method of aggregation (eg, median,    |       |
| 46 |                      |                      | proportion), and time point for each outcome. Explanation    |       |
| 47 |                      |                      | of the clinical relevance of chosen efficacy and harm        |       |
| 48 |                      |                      | outcomes is strongly recommended                             |       |
| 49 |                      |                      |                                                              |       |
| 50 |                      |                      |                                                              |       |
| 51 |                      |                      |                                                              |       |
| 52 |                      |                      |                                                              |       |
| 53 |                      |                      |                                                              |       |
| 54 |                      |                      |                                                              |       |
| 55 |                      |                      |                                                              |       |
| 56 |                      |                      |                                                              |       |
| 57 |                      |                      |                                                              |       |
| 58 |                      |                      |                                                              |       |
| 59 |                      |                      |                                                              |       |
| 60 |                      |                      |                                                              |       |

|    |                           |                      |                                                            |       |
|----|---------------------------|----------------------|------------------------------------------------------------|-------|
| 1  | Participant timeline      | <a href="#">#13</a>  | Time schedule of enrolment, interventions (including any   | 14    |
| 2  |                           |                      | run-ins and washouts), assessments, and visits for         |       |
| 3  |                           |                      | participants. A schematic diagram is highly recommended    |       |
| 4  |                           |                      | (see Figure)                                               |       |
| 5  |                           |                      |                                                            |       |
| 6  |                           |                      |                                                            |       |
| 7  |                           |                      |                                                            |       |
| 8  |                           |                      |                                                            |       |
| 9  |                           |                      |                                                            |       |
| 10 |                           |                      |                                                            |       |
| 11 | Sample size               | <a href="#">#14</a>  | Estimated number of participants needed to achieve         | 14    |
| 12 |                           |                      | study objectives and how it was determined, including      |       |
| 13 |                           |                      | clinical and statistical assumptions supporting any sample |       |
| 14 |                           |                      | size calculations                                          |       |
| 15 |                           |                      |                                                            |       |
| 16 |                           |                      |                                                            |       |
| 17 |                           |                      |                                                            |       |
| 18 |                           |                      |                                                            |       |
| 19 |                           |                      |                                                            |       |
| 20 |                           |                      |                                                            |       |
| 21 | Recruitment               | <a href="#">#15</a>  | Strategies for achieving adequate participant enrolment to | 15-16 |
| 22 |                           |                      | reach target sample size                                   |       |
| 23 |                           |                      |                                                            |       |
| 24 |                           |                      |                                                            |       |
| 25 |                           |                      |                                                            |       |
| 26 | <b>Methods:</b>           |                      |                                                            |       |
| 27 |                           |                      |                                                            |       |
| 28 | <b>Assignment of</b>      |                      |                                                            |       |
| 29 | <b>interventions (for</b> |                      |                                                            |       |
| 30 | <b>controlled trials)</b> |                      |                                                            |       |
| 31 |                           |                      |                                                            |       |
| 32 |                           |                      |                                                            |       |
| 33 |                           |                      |                                                            |       |
| 34 |                           |                      |                                                            |       |
| 35 |                           |                      |                                                            |       |
| 36 | Allocation: sequence      | <a href="#">#16a</a> | Method of generating the allocation sequence (eg,          | 9     |
| 37 | generation                |                      | computer-generated random numbers), and list of any        |       |
| 38 |                           |                      | factors for stratification. To reduce predictability of a  |       |
| 39 |                           |                      | random sequence, details of any planned restriction (eg,   |       |
| 40 |                           |                      | blocking) should be provided in a separate document that   |       |
| 41 |                           |                      | is unavailable to those who enrol participants or assign   |       |
| 42 |                           |                      | interventions                                              |       |
| 43 |                           |                      |                                                            |       |
| 44 |                           |                      |                                                            |       |
| 45 |                           |                      |                                                            |       |
| 46 |                           |                      |                                                            |       |
| 47 |                           |                      |                                                            |       |
| 48 |                           |                      |                                                            |       |
| 49 |                           |                      |                                                            |       |
| 50 |                           |                      |                                                            |       |
| 51 |                           |                      |                                                            |       |
| 52 |                           |                      |                                                            |       |
| 53 | Allocation                | <a href="#">#16b</a> | Mechanism of implementing the allocation sequence (eg,     | 9     |
| 54 | concealment               |                      | central telephone; sequentially numbered, opaque,          |       |
| 55 |                           |                      |                                                            |       |
| 56 |                           |                      |                                                            |       |
| 57 |                           |                      |                                                            |       |
| 58 | mechanism                 |                      |                                                            |       |
| 59 |                           |                      |                                                            |       |
| 60 |                           |                      |                                                            |       |



sealed envelopes), describing any steps to conceal the sequence until interventions are assigned

Allocation: [#16c](#) Who will generate the allocation sequence, who will enrol participants, and who will assign participants to interventions 9

Blinding (masking) [#17a](#) Who will be blinded after assignment to interventions (eg, trial participants, care providers, outcome assessors, data analysts), and how 9

Blinding (masking): [#17b](#) If blinded, circumstances under which unblinding is permissible, and procedure for revealing a participant's allocated intervention during the trial 9

**Methods: Data collection, management, and analysis**

Data collection plan [#18a](#) Plans for assessment and collection of outcome, baseline, and other trial data, including any related processes to promote data quality (eg, duplicate measurements, training of assessors) and a description of study instruments (eg, questionnaires, laboratory tests) along with their reliability and validity, if known. Reference to where data collection forms can be found, if not in the protocol 14

|    |                            |                      |                                                                |       |
|----|----------------------------|----------------------|----------------------------------------------------------------|-------|
| 1  | Data collection plan:      | <a href="#">#18b</a> | Plans to promote participant retention and complete            | 14    |
| 2  |                            |                      |                                                                |       |
| 3  | retention                  |                      | follow-up, including list of any outcome data to be            |       |
| 4  |                            |                      | collected for participants who discontinue or deviate from     |       |
| 5  |                            |                      | intervention protocols                                         |       |
| 6  |                            |                      |                                                                |       |
| 7  |                            |                      |                                                                |       |
| 8  |                            |                      |                                                                |       |
| 9  |                            |                      |                                                                |       |
| 10 |                            |                      |                                                                |       |
| 11 | Data management            | <a href="#">#19</a>  | Plans for data entry, coding, security, and storage,           | 14    |
| 12 |                            |                      | including any related processes to promote data quality        |       |
| 13 |                            |                      | (eg, double data entry; range checks for data values).         |       |
| 14 |                            |                      | Reference to where details of data management                  |       |
| 15 |                            |                      | procedures can be found, if not in the protocol                |       |
| 16 |                            |                      |                                                                |       |
| 17 |                            |                      |                                                                |       |
| 18 |                            |                      |                                                                |       |
| 19 |                            |                      |                                                                |       |
| 20 |                            |                      |                                                                |       |
| 21 |                            |                      |                                                                |       |
| 22 |                            |                      |                                                                |       |
| 23 | Statistics: outcomes       | <a href="#">#20a</a> | Statistical methods for analysing primary and secondary        | 14-15 |
| 24 |                            |                      | outcomes. Reference to where other details of the              |       |
| 25 |                            |                      | statistical analysis plan can be found, if not in the protocol |       |
| 26 |                            |                      |                                                                |       |
| 27 |                            |                      |                                                                |       |
| 28 |                            |                      |                                                                |       |
| 29 |                            |                      |                                                                |       |
| 30 |                            |                      |                                                                |       |
| 31 | Statistics: additional     | <a href="#">#20b</a> | Methods for any additional analyses (eg, subgroup and          | 14-15 |
| 32 | analyses                   |                      | adjusted analyses)                                             |       |
| 33 |                            |                      |                                                                |       |
| 34 |                            |                      |                                                                |       |
| 35 |                            |                      |                                                                |       |
| 36 | Statistics: analysis       | <a href="#">#20c</a> | Definition of analysis population relating to protocol non-    | 14    |
| 37 | population and             |                      | adherence (eg, as randomised analysis), and any                |       |
| 38 | missing data               |                      | statistical methods to handle missing data (eg, multiple       |       |
| 39 |                            |                      | imputation)                                                    |       |
| 40 |                            |                      |                                                                |       |
| 41 |                            |                      |                                                                |       |
| 42 |                            |                      |                                                                |       |
| 43 |                            |                      |                                                                |       |
| 44 |                            |                      |                                                                |       |
| 45 |                            |                      |                                                                |       |
| 46 | <b>Methods: Monitoring</b> |                      |                                                                |       |
| 47 |                            |                      |                                                                |       |
| 48 |                            |                      |                                                                |       |
| 49 | Data monitoring:           | <a href="#">#21a</a> | Composition of data monitoring committee (DMC);                | 15-16 |
| 50 | formal committee           |                      | summary of its role and reporting structure; statement of      |       |
| 51 |                            |                      | whether it is independent from the sponsor and                 |       |
| 52 |                            |                      | competing interests; and reference to where further            |       |
| 53 |                            |                      |                                                                |       |
| 54 |                            |                      |                                                                |       |
| 55 |                            |                      |                                                                |       |
| 56 |                            |                      |                                                                |       |
| 57 |                            |                      |                                                                |       |
| 58 |                            |                      |                                                                |       |
| 59 |                            |                      |                                                                |       |
| 60 |                            |                      |                                                                |       |

1 details about its charter can be found, if not in the  
 2 protocol. Alternatively, an explanation of why a DMC is  
 3 not needed  
 4  
 5  
 6  
 7

|    |                      |                      |                                                              |       |
|----|----------------------|----------------------|--------------------------------------------------------------|-------|
| 8  | Data monitoring:     | <a href="#">#21b</a> | Description of any interim analyses and stopping             | 15-16 |
| 9  | interim analysis     |                      | guidelines, including who will have access to these          |       |
| 10 |                      |                      | interim results and make the final decision to terminate     |       |
| 11 |                      |                      | the trial                                                    |       |
| 12 |                      |                      |                                                              |       |
| 13 |                      |                      |                                                              |       |
| 14 |                      |                      |                                                              |       |
| 15 |                      |                      |                                                              |       |
| 16 |                      |                      |                                                              |       |
| 17 |                      |                      |                                                              |       |
| 18 | Harms                | <a href="#">#22</a>  | Plans for collecting, assessing, reporting, and managing     | 15-16 |
| 19 |                      |                      | solicited and spontaneously reported adverse events and      |       |
| 20 |                      |                      | other unintended effects of trial interventions or trial     |       |
| 21 |                      |                      | conduct                                                      |       |
| 22 |                      |                      |                                                              |       |
| 23 |                      |                      |                                                              |       |
| 24 |                      |                      |                                                              |       |
| 25 |                      |                      |                                                              |       |
| 26 |                      |                      |                                                              |       |
| 27 |                      |                      |                                                              |       |
| 28 | Auditing             | <a href="#">#23</a>  | Frequency and procedures for auditing trial conduct, if      | 15-16 |
| 29 |                      |                      | any, and whether the process will be independent from        |       |
| 30 |                      |                      | investigators and the sponsor                                |       |
| 31 |                      |                      |                                                              |       |
| 32 |                      |                      |                                                              |       |
| 33 |                      |                      |                                                              |       |
| 34 |                      |                      |                                                              |       |
| 35 | <b>Ethics and</b>    |                      |                                                              |       |
| 36 | <b>dissemination</b> |                      |                                                              |       |
| 37 |                      |                      |                                                              |       |
| 38 |                      |                      |                                                              |       |
| 39 |                      |                      |                                                              |       |
| 40 |                      |                      |                                                              |       |
| 41 | Research ethics      | <a href="#">#24</a>  | Plans for seeking research ethics committee / institutional  | 16    |
| 42 | approval             |                      | review board (REC / IRB) approval                            |       |
| 43 |                      |                      |                                                              |       |
| 44 |                      |                      |                                                              |       |
| 45 |                      |                      |                                                              |       |
| 46 | Protocol             | <a href="#">#25</a>  | Plans for communicating important protocol modifications     | 16    |
| 47 | amendments           |                      | (eg, changes to eligibility criteria, outcomes, analyses) to |       |
| 48 |                      |                      | relevant parties (eg, investigators, REC / IRBs, trial       |       |
| 49 |                      |                      | participants, trial registries, journals, regulators)        |       |
| 50 |                      |                      |                                                              |       |
| 51 |                      |                      |                                                              |       |
| 52 |                      |                      |                                                              |       |
| 53 |                      |                      |                                                              |       |
| 54 |                      |                      |                                                              |       |
| 55 |                      |                      |                                                              |       |
| 56 |                      |                      |                                                              |       |
| 57 |                      |                      |                                                              |       |
| 58 |                      |                      |                                                              |       |
| 59 |                      |                      |                                                              |       |
| 60 |                      |                      |                                                              |       |

|    |                       |                      |                                                                |       |
|----|-----------------------|----------------------|----------------------------------------------------------------|-------|
| 1  | Consent or assent     | <a href="#">#26a</a> | Who will obtain informed consent or assent from potential      | 6,9   |
| 2  |                       |                      | trial participants or authorised surrogates, and how (see      |       |
| 3  |                       |                      | Item 32)                                                       |       |
| 4  |                       |                      |                                                                |       |
| 5  |                       |                      |                                                                |       |
| 6  |                       |                      |                                                                |       |
| 7  |                       |                      |                                                                |       |
| 8  |                       |                      |                                                                |       |
| 9  | Consent or assent:    | <a href="#">#26b</a> | Additional consent provisions for collection and use of        | 6,9   |
| 10 |                       |                      | participant data and biological specimens in ancillary         |       |
| 11 | ancillary studies     |                      | studies, if applicable                                         |       |
| 12 |                       |                      |                                                                |       |
| 13 |                       |                      |                                                                |       |
| 14 |                       |                      |                                                                |       |
| 15 |                       |                      |                                                                |       |
| 16 | Confidentiality       | <a href="#">#27</a>  | How personal information about potential and enrolled          | 16    |
| 17 |                       |                      | participants will be collected, shared, and maintained in      |       |
| 18 |                       |                      | order to protect confidentiality before, during, and after     |       |
| 19 |                       |                      | the trial                                                      |       |
| 20 |                       |                      |                                                                |       |
| 21 |                       |                      |                                                                |       |
| 22 |                       |                      |                                                                |       |
| 23 |                       |                      |                                                                |       |
| 24 |                       |                      |                                                                |       |
| 25 |                       |                      |                                                                |       |
| 26 | Declaration of        | <a href="#">#28</a>  | Financial and other competing interests for principal          | 20    |
| 27 |                       |                      | investigators for the overall trial and each study site        |       |
| 28 | interests             |                      |                                                                |       |
| 29 |                       |                      |                                                                |       |
| 30 |                       |                      |                                                                |       |
| 31 |                       |                      |                                                                |       |
| 32 | Data access           | <a href="#">#29</a>  | Statement of who will have access to the final trial           | 16    |
| 33 |                       |                      | dataset, and disclosure of contractual agreements that         |       |
| 34 |                       |                      | limit such access for investigators                            |       |
| 35 |                       |                      |                                                                |       |
| 36 |                       |                      |                                                                |       |
| 37 |                       |                      |                                                                |       |
| 38 |                       |                      |                                                                |       |
| 39 | Ancillary and post    | <a href="#">#30</a>  | Provisions, if any, for ancillary and post-trial care, and for | 15-16 |
| 40 |                       |                      | compensation to those who suffer harm from trial               |       |
| 41 | trial care            |                      | participation                                                  |       |
| 42 |                       |                      |                                                                |       |
| 43 |                       |                      |                                                                |       |
| 44 |                       |                      |                                                                |       |
| 45 |                       |                      |                                                                |       |
| 46 |                       |                      |                                                                |       |
| 47 | Dissemination policy: | <a href="#">#31a</a> | Plans for investigators and sponsor to communicate trial       | 16    |
| 48 |                       |                      | results to participants, healthcare professionals, the         |       |
| 49 | trial results         |                      | public, and other relevant groups (eg, via publication,        |       |
| 50 |                       |                      | reporting in results databases, or other data sharing          |       |
| 51 |                       |                      | arrangements), including any publication restrictions          |       |
| 52 |                       |                      |                                                                |       |
| 53 |                       |                      |                                                                |       |
| 54 |                       |                      |                                                                |       |
| 55 |                       |                      |                                                                |       |
| 56 |                       |                      |                                                                |       |
| 57 |                       |                      |                                                                |       |
| 58 |                       |                      |                                                                |       |
| 59 |                       |                      |                                                                |       |
| 60 |                       |                      |                                                                |       |

1 Dissemination policy: [#31b](#) Authorship eligibility guidelines and any intended use of 16  
 2  
 3 authorship professional writers  
 4  
 5

6 Dissemination policy: [#31c](#) Plans, if any, for granting public access to the full 16  
 7  
 8 reproducible protocol, participant-level dataset, and statistical code  
 9  
 10 research  
 11  
 12

## 13 Appendices

14  
 15  
 16  
 17 Informed consent [#32](#) Model consent form and other related documentation NA  
 18  
 19 materials given to participants and authorised surrogates  
 20  
 21

22  
 23 Biological specimens [#33](#) Plans for collection, laboratory evaluation, and storage of NA  
 24  
 25 biological specimens for genetic or molecular analysis in  
 26  
 27 the current trial and for future use in ancillary studies, if  
 28  
 29 applicable  
 30  
 31

32  
 33 None The SPIRIT Explanation and Elaboration paper is distributed under the terms of the Creative  
 34  
 35 Commons Attribution License CC-BY-NC. This checklist can be completed online using  
 36  
 37 <https://www.goodreports.org/>, a tool made by the [EQUATOR Network](#) in collaboration with  
 38  
 39 [Penelope.ai](#)  
 40  
 41  
 42  
 43  
 44  
 45  
 46  
 47  
 48  
 49  
 50  
 51  
 52  
 53  
 54  
 55  
 56  
 57  
 58  
 59  
 60
